# Supplementary material for: Scanning the Horizon for Environmental Applications of Genetically Modified Viruses Reveals Challenges for Their Environmental Risk Assessment
Source: MDPI journal article supplement (doi:10.3390/ijms25031507), 2024-01-25
Supplement: s1 [file s1]

## Supplementary materials (Eckerstorfer et al. 2024)

**Table S1:** List of publications identified for GM viruses used as molecular tools in biotechnology applications, indicating their status of development and the use of GM viruses. VIGS: virus induced gene silencing; VAGE: virus aided gene expression; Status: assigned status of development; BR (L): Basic research (vector developed in laboratory conducting the study); R&D (SC): Research and development (vector shared in scientific community); NM/M (C): near market/market (vector available commercially)

| No. | Virus used as vector                      | Purpose of the application | Purpose of the Study                                                                                                                             | Reference (study) | Status (vector) | Reference (vector) |
|-----|-------------------------------------------|----------------------------|--------------------------------------------------------------------------------------------------------------------------------------------------|-------------------|-----------------|--------------------|
| 1   | Tobacco rattle virus (TRV); pTRV1&pTRV2   | VIGS                       | Silencing genes involved in drought tolerance                                                                                                    | [1]               | R&D (SC)        | [2]                |
| 2   | Tobacco rattle virus (TRV); pTRV1&pTRV2   | VIGS                       | Study of silenced and overexpressed gene involved in drought tolerance                                                                           | [3]               | R&D (SC)        | [2]                |
| 3   | -                                         | Biology study (BPIV-3)     | Development of molecular characterization to assess the role of homologous recombination events in the evolution of Bovine parainfluenza-3 virus | [4]               | -               | -                  |
| 4   | Nucleopolyhedrovirus (BmNPV), BmNPV/DmTβH | VAGE                       | Baculovirus-mediated expression of protein in <i>Bombyx mori</i>                                                                                 | [5]               | BR (L)          | [6]                |
| 5   | Tobacco rattle virus (TRV); pTRV1&pTRV2   | VIGS                       | VIGS to suppress genes inducing programmed cell death to confer tolerance against abiotic stresses in plants.                                    | [7]               | R&D (SC)        | [2,8,9]            |
| 6   | Tobacco rattle virus (TRV); pTRV1&pTRV2   | VIGS                       | VIGS of NbDODAL1 gene to modify the metabolism of aromatic compounds contributing to antimicrobial or antioxidative activity                     | [10]              | R&D (SC)        | [2]                |
| 7   | Tobacco rattle virus (TRV); pTRV1&pTRV2   | VIGS                       | VIGS to silence LOX2 expression to induce anti-herbivory responses against <i>S. littoralis</i> larvae                                           | [11]              | R&D (SC)        | [2]                |

|    |                                                  |                                    |                                                                                                                                                                                         |      |          |                                       |
|----|--------------------------------------------------|------------------------------------|-----------------------------------------------------------------------------------------------------------------------------------------------------------------------------------------|------|----------|---------------------------------------|
| 8  | Nucleopolyhedrosis virus (BmNPV); pcDNA3.0, PGL3 | VAGE                               | BmNPV-driven expression of miRNAs regulating gene expression in <i>Bombyx mori</i>                                                                                                      | [12] | R&D (SC) | [13]                                  |
| 9  | -                                                | Virus-host specificity baculovirus | Study of virus-host specificity to aid the application of baculovirus in protein expression systems and the development of bio-control agents                                           | [14] | -        | -                                     |
| 10 | Tobacco rattle virus (TRV); pTRV1&pTRV2          | VIGS                               | VIGS of GhGPA expression in Arabidopsis increased susceptibility to Verticillium wilt                                                                                                   | [15] | R&D (SC) | [2,16]                                |
| 11 | Tobacco rattle virus (TRV); pTRV1&pTRV2-LIC      | VIGS                               | Development of TRV vectors for VIGS in <i>Centaurea spp.</i>                                                                                                                            | [17] | R&D (SC) | [18]                                  |
| 12 | Baculovirus, pFastBac™ Dual Expression Vector    | VAGE                               | Development of a baculovirus recombinant expression of transmembrane SVCV-G protein in insect cells, for use as whole-cell subunit vaccine through the oral and injection route in carp | [19] | NM/M (C) | Invitrogen / Thermo Fisher Scientific |
| 13 | Baculovirus, pFastBac™ Dual Expression Vector    | VAGE                               | Baculovirus mediated expression of proteins for use in ELISA                                                                                                                            | [20] | NM/M (C) | Invitrogen / Thermo Fisher Scientific |
| 14 | Baculovirus; BmNPV K1                            | VAGE                               | Design of Baculovirus vectors for high efficiency protein expression                                                                                                                    | [21] | BR (L)   | [22]                                  |
| 15 | Cymbidium mosaic virus (CymMV); CymMV-Gateway    | VIGS                               | CymMV-based VIGS system to be used with orchids                                                                                                                                         | [23] | R&D (SC) | [24]                                  |
| 16 | Tobacco rattle virus (TRV); pTRV1&pTRV2          | VIGS                               | VIGS silencing of SINAC61 transcription factor to elicit response to Tomato yellow leaf curl virus infection.                                                                           | [25] | R&D (SC) | [2]                                   |

|    |                                                        |      |                                                                                                                                                                                                             |      |          |                                       |
|----|--------------------------------------------------------|------|-------------------------------------------------------------------------------------------------------------------------------------------------------------------------------------------------------------|------|----------|---------------------------------------|
| 17 | Hemorrhagic septicemia virus (VHSV); pVHSV-A-RFP       | VAGE | GM VHSV to express IFN-proteins in flounder cells                                                                                                                                                           | [26] | R&D (SC) | [27]                                  |
| 18 | Barley stripe mosaic virus (BSMV); BSMV-sg vectors     | VAGE | Development of BSMV-based sgRNA delivery vector (BSMV-sg) in wheat                                                                                                                                          | [28] | BR (L)   | [29]                                  |
| 19 | Tobacco rattle virus (TRV); pTRV1&pTRV2                | VIGS | VIGS to elucidate the role of the PYL4 gene in response to drought in tomato                                                                                                                                | [30] | R&D (SC) | [9,31]                                |
| 20 | Cucumber green mottle mosaic virus (CGMMV); pXT- CGMMV | VAGE | CGMMV-based virus vectors to test use of subgenomic promoters                                                                                                                                               | [32] | R&D (SC) | [33]                                  |
| 21 | Barley stripe mosaic virus (BSMV); pCa- $\gamma$ bLIC  | VIGS | VIGS to address cereal cyst nematode (CCN) infections in barley                                                                                                                                             | [34] | R&D (SC) | [35]                                  |
| 22 | Tobacco rattle virus (TRV); pTRV1&pTRV2                | VIGS | VIGS-mediated knockdown of PAP3 led to the shriveling of pollen grains and male sterility in peppers                                                                                                        | [36] | R&D (SC) | [2]                                   |
| 23 | Tobacco rattle virus (TRV); pTRV1&pTRV2                | VIGS | VIGS-mediated silencing of GhHD-1A and GhHD-1D in allotetraploid cotton significantly reduces the density of leaf hairs and affects the expression levels of other genes related to leaf trichome formation | [37] | R&D (SC) | [2]                                   |
| 24 | Baculovirus, pFastBac™ Dual Expression Vector          | VAGE | Baculovirus expression of Bovine parainfluenza virus type 3 (BPIV3) self-assembled GM-BPIV3 nanoparticles                                                                                                   | [38] | NM/M (C) | Invitrogen / Thermo Fisher Scientific |
| 25 | Tobacco rattle virus (TRV); pTRV1&pTRV2                | VIGS | VIGS to study the Ph-3-dependent resistance signaling pathway in tomato                                                                                                                                     | [39] | R&D (SC) | [2,40]                                |

|    |                                                                 |      |                                                                                                                                                    |      |          |                                             |
|----|-----------------------------------------------------------------|------|----------------------------------------------------------------------------------------------------------------------------------------------------|------|----------|---------------------------------------------|
| 26 | Tobacco rattle virus (TRV);<br>pTRV1&pTRV2                      | VIGS | TRV-based VIGS for gene function research in <i>Forsythia</i>                                                                                      | [41] | R&D (SC) | [2]                                         |
| 27 | Barley stripe mosaic virus (BSMV); pSL038-1                     | VIGS | VIGS based functional study of TaNAC032 in Fusarium head blight in wheat                                                                           | [42] | R&D (SC) | [43]                                        |
| 28 | Tobacco rattle virus (TRV);<br>pTRV1&pTRV2                      | VIGS | VIGS to downregulate SLB3 expression to reveal the function of the SLB3 gene under drought stress in tomato                                        | [44] | R&D (SC) | [2]                                         |
| 29 | Baculovirus; Bac-to-Bac™<br>Vector                              | VAGE | Development of pseudotyped recombinant baculovirus (Bacmid-GUS/VP28) for infection and expression in penaeid shrimps                               | [45] | NM/M (C) | Invitrogen /<br>Thermo Fisher<br>Scientific |
| 30 | Tobacco rattle virus (TRV);<br>pTRV1&pTRV2                      | VIGS | TRV-based VIGS of a Phytoene Desaturase ortholog (LhPDS) in Lilium                                                                                 | [46] | R&D (SC) | [2]                                         |
| 31 | Barley yellow striate<br>mosaic virus (BYSMV);<br>pBY-GR vector | VAGE | BYSMV a plant cytorhabdovirus as versatile expression platforms in small brown planthoppers and cereal plants.                                     | [47] | R&D (SC) | [48]                                        |
| 32 | Tobacco rattle virus (TRV);<br>pTRV1&pTRV2                      | VIGS | Development of a TRV-based VIGS system in Chinese narcissus                                                                                        | [49] | R&D (SC) | [2]                                         |
| 33 | Baculovirus, pFastBac™<br>Dual Expression Vector                | VAGE | Development of a baculovirus insect cell system for expression of capsid protein of Infectious hypodermal and hematopoietic necrosis virus (IHHNV) | [50] | NM/M (C) | Invitrogen /<br>Thermo Fisher<br>Scientific |

**Table S2:** List of publications identified for GM viruses for the development of vaccines for animals, indicating their status of development and the use of GM viruses  
Status: Status of development; BR: Basic research; R&D: Research and development; FT: Field trial

| No. | Virus                                             | Purpose of the application | Purpose of the Study                                                                                                                                                                                           | Reference (study) | Status | GMO |
|-----|---------------------------------------------------|----------------------------|----------------------------------------------------------------------------------------------------------------------------------------------------------------------------------------------------------------|-------------------|--------|-----|
| 1   | Canine distemper virus (CDV)                      | Dog vaccine                | Evaluation of wild-type CDV and vaccine isolates to determine if the genetic differences among various strains result in significant antigenic differences                                                     | [51]              | BR     | No  |
| 2   | Bovine herpesvirus 5                              | Cattle vaccine             | A recombinant bovine herpesvirus 5 lacking thymidine kinase and glycoprotein E genes (BoHV-5gEΔTKΔ) was evaluated as a live experimental vaccine.                                                              | [52]              | R&D    | Yes |
| 3   | Feline Coronavirus (PBFIPV-DF-2, PBFIPV-DF-2-R3i) | Cat vaccine                | Evaluation of a FCoV pair as possible vaccine candidates                                                                                                                                                       | [53]              | R&D    | Yes |
| 4   | Equine herpesvirus type-1 (EHV-1)                 | Horse vaccine              | Assessment of intranasal and intramuscular vaccination of horses with a modified live equine herpesvirus type-1 (EHV-1) vaccine                                                                                | [54]              | R&D    | No  |
| 5   | Bovine rotavirus                                  | Cattle vaccine             | Test of adjuvanted vaccine containing recombinantly-expressed rotavirus virus-like particles                                                                                                                   | [55]              | R&D    | No  |
| 6   | Betanodavirus                                     | Fish vaccine               | Review of antigenic preparations derived from the viral encephalopathy and retinopathy virus (betanodavirus) used in European sea bass                                                                         | [56]              | BR     | No  |
| 7   | Bovine herpesvirus type 5 (BoHV-5)                | Cattle vaccine             | Evaluation of inactivated, oil adjuvanted vaccine prepared with a GM BoHV-5 from which the genes coding for glycoprotein I (gI), glycoprotein E (gE) and membrane protein US9 were deleted (BoHV-5 gI/gE/US9–) | [57]              | R&D    | Yes |
| 8   | Pseudorabies virus (PRV)                          | Pig vector vaccine         | GM PRV expressing siRNAs against the ORF7 of porcine reproductive and respiratory syndrome virus (HP-PRRSV)                                                                                                    | [58]              | BR     | Yes |
| 9   | Baculovirus                                       | Fish vector                | Testing of GM baculoviruses expressing nine truncated membrane glycoproteins                                                                                                                                   | [59]              | R&D    | Yes |

|    |                                                             |                                         |                                                                                                                                                                                                                                                                                                          |      |     |     |
|----|-------------------------------------------------------------|-----------------------------------------|----------------------------------------------------------------------------------------------------------------------------------------------------------------------------------------------------------------------------------------------------------------------------------------------------------|------|-----|-----|
|    |                                                             | vaccine                                 | of Cyprinid herpesvirus 2 (CyHV-2)                                                                                                                                                                                                                                                                       |      |     |     |
| 10 | Porcine reproductive and respiratory syndrome virus (PRRSV) | Pig vaccine                             | Evaluation of the cross-protection efficacy of two commercial PRRS modified-live virus (MLV) vaccines, derived from classical PRRSV (VR2332) and highly pathogenic (HP) PRRSV (TJM-F92), against a NADC30-like lineage in pigs                                                                           | [60] | R&D | No  |
| 11 | Porcine reproductive and respiratory syndrome virus (PRRSV) | Pig vaccine                             | Research into concerns about modified live vaccines (MLV)-derived PRRSV isolates                                                                                                                                                                                                                         | [61] | BR  | No  |
| 12 | Siniperca chuatsi rhabdovirus (SCRV)                        | Fish DNA vaccine                        | Determination of the antiviral immune response elicited by DNA vaccination in mandarin fish.                                                                                                                                                                                                             | [62] | BR  | No  |
| 13 | Porcine reproductive and respiratory syndrome virus (PRRSV) | Pig vaccine                             | Safety and efficacy tests under experimental and field conditions for evaluation of K418DM1.1, a plaque-purified K418DM PRRSV vaccine                                                                                                                                                                    | [63] | FT  | Yes |
| 14 | Viral hemorrhagic septicemia virus (VHSV)                   | Fish vaccine (viral replicon particles) | Viral replicon particles / single-cycle viruses defective for function(s) needed for viral replication for safer vaccination of animals (olive flounders) against compared to attenuated live viruses                                                                                                    | [64] | R&D | Yes |
| 15 | Betanodaviruses (Nodaviridae)                               | Fish vaccines                           | Assessment of viral encephalopathy and retinopathy (VER) disease agents: Striped Jack nervous necrosis virus (SJNNV), Tiger puffer nervous necrosis virus (TPNNV), Barfin flounder nervous necrosis virus (BFNNV), Red-spotted grouper nervous necrosis virus (RGNNV), turbot betanodavirus strain (TNV) | [65] | BR  | No  |
| 16 | Porcine reproductive and respiratory syndrome virus (PRRSV) | Pig vaccine                             | Assessment of a novel recombinant PRRSV, SD043, isolated from a pig farm experiencing disease in 2019                                                                                                                                                                                                    | [66] | BR  | No  |
| 17 | Sindbis virus (SV)                                          | Cattle SV-DNA prime-protein             | Development of a SV replicase-based DNA vaccine against foot-and-mouth disease                                                                                                                                                                                                                           | [67] | BR  | Yes |

|    |                                                             |                           |                                                                                                                                                        |      |    |     |
|----|-------------------------------------------------------------|---------------------------|--------------------------------------------------------------------------------------------------------------------------------------------------------|------|----|-----|
|    |                                                             | boost vaccine             |                                                                                                                                                        |      |    |     |
| 18 | Infectious spleen and kidney necrosis virus (ISKNV)         | Fish vaccine              | Assessment of a formalin-killed cell-cultured ISKNV vaccine mandarin fish in China as basis for GM ISKNV vaccines                                      | [68] | BR | No  |
| 19 | Newcastle disease virus (NDV)                               | Poultry / Chicken vaccine | Assessment of different NDV vaccines for efficacy against different isolates based on different vaccination regimes                                    | [69] | BR | Yes |
| 20 | Porcine reproductive and respiratory syndrome virus (PRRSV) | Pig vaccine               | Assessment of co-infection of a PRRSV type 1 modified live vaccine-like strain and a type 2 porcine circovirus (PCV2)                                  | [70] | BR | No  |
| 21 | Avian infectious bronchitis virus (IB)                      | Poultry vaccine           | Non-GM IB vaccine variant testing                                                                                                                      | [71] | FT | No  |
| 22 | Lumpy Skin Disease virus (LSDV) and Bluetongue virus (BTV)  | Cattle vaccine            | Developed of an inactivated, oil adjuvanted bivalent vaccine against both Lumpy Skin and Bluetongue disease based on LSDV Neethling strain and BTV4    | [72] | BR | No  |
| 23 | Infectious bursal disease virus (IBDV)                      | Poultry vaccine           | Development and testing of a reassortment virus strain rGtVarVP2 effective against the novel variant IBDV                                              | [73] | FT | Yes |
| 24 | Newcastle disease virus (NDV)                               | Poultry vaccine           | Development and testing of an in-ovo NDV vaccine strain TS09-C to induce protective cellular immunity in chicks in the presence of maternal antibodies | [74] | FT | No  |
| 25 | Classical Swine Fever Virus (CSFV)                          | Pig vaccine               | Characterisation of genetic modifications in attenuated vaccine strains of CSFV                                                                        | [75] | BR | No  |
| 26 | African swine fever virus (ASFV)                            | Pig vaccine               | Molecular evolution of circulating ASFV isolates and the important role of this gene in the evasion of the host immune system                          | [76] | BR | No  |
| 27 | Pseudorabies virus (PrV)                                    | Pig vector vaccine        | Review of GM PrV as a powerful vector system for expression of foreign genes to                                                                        | [77] | BR | Yes |

|    |                                                                                                |                        |                                                                                                                                                                                              |      |     |     |
|----|------------------------------------------------------------------------------------------------|------------------------|----------------------------------------------------------------------------------------------------------------------------------------------------------------------------------------------|------|-----|-----|
|    |                                                                                                |                        | vaccinate against several infectious diseases of swine                                                                                                                                       |      |     |     |
| 28 | Semliki Forest virus (SFV)                                                                     | Poultry DNA vaccine    | A suicidal DNA vaccine based on a Semliki Forest virus (SFV) replicon was evaluated for the development of a vaccine against duck hepatitis virus type 1 (DHV-1)                             | [78] | R&D | Yes |
| 29 | Porcine reproductive and respiratory syndrome virus (PRRSV)                                    | Pig vaccine            | Testing of a recombinant PRRS virus (PRRSV) vectored vaccine candidate rPRRSV-E2, which expresses CSF virus (CSFV) E2 protein,                                                               | [79] | FT  | Yes |
| 30 | Infectious bursal disease virus (IBDV)                                                         | Poultry DNA vaccine    | Development of a DNA prime–protein boost vaccine against IBDV                                                                                                                                | [80] | R&D | Yes |
| 31 | Foot-and-mouth disease virus (FMDV)                                                            | Cattle vaccine         | Characterisation of the effects of genetic changes in attenuated FMDV isolates                                                                                                               | [81] | BR  | Yes |
| 32 | Newcastle diseases virus (NDV) and Marek's disease virus (MDV)                                 | Poultry vector vaccine | New generation vector vaccines against infectious laryngotracheitis in poultry stocks                                                                                                        | [82] | R&D | Yes |
| 33 | Canarypox virus (CV)                                                                           | Dog vector vaccine     | Development of a recombinant canarypox virus “ALVAC-CDV-M-F-H/C5–” against Canine distemper virus (CDV) that contained CDV virus-like particles (VLPs) by using the CRISPR/Cas9 gene editing | [83] | R&D | Yes |
| 34 | Infectious hematopoietic necrosis virus (IHNV) and infectious pancreatic necrosis virus (IPNV) | Fish vaccine           | Development of rIHNV-IPNV VP2 and rIHNV-IPNV VP2COE candidate vaccine against IHNV and IPNV in rainbow trout                                                                                 | [84] | R&D | Yes |
| 35 | Oxyeleotris marmoratus iridovirus (OMIV) and Oxyeleotris marmoratus                            | Fish vaccine           | Development of a bivalent inactivated vaccine against OMIV and OMRV and evaluation of its protective effect in marbled sleepy goby <i>Oxyeleotris marmoratus</i>                             | [85] | R&D | No  |



|    |                                                             |                 |                                                                                                                                                                                                                                                                                                                                                                           |      |     |     |
|----|-------------------------------------------------------------|-----------------|---------------------------------------------------------------------------------------------------------------------------------------------------------------------------------------------------------------------------------------------------------------------------------------------------------------------------------------------------------------------------|------|-----|-----|
|    | rhabdovirus (OMRV)                                          |                 |                                                                                                                                                                                                                                                                                                                                                                           |      |     |     |
| 36 | Tembusu virus (TMUV)                                        | Poultry vaccine | Development of a polytope DNA vaccine (pVAX1-rTEM) consisting of B-cell and T cell epitopes from the TMUV envelope (E) protein                                                                                                                                                                                                                                            | [86] | R&D | Yes |
| 37 | Porcine circovirus 2 (PCV2)                                 | -               | Characterisation of genotypes and the evolution of Porcine circoviruses                                                                                                                                                                                                                                                                                                   | [87] | BR  | No  |
| 38 | Koi herpesvirus (KHV) or Cyprinid Herpesvirus 3 (CyHV-3)    | Fish vaccine    | Development of a coupled plasmid expression vector for ORF149 and single walled carbon nanotubes (SWCNTs) for an anti-KHV vaccine                                                                                                                                                                                                                                         | [88] | R&D | Yes |
| 39 | Porcine epidemic diarrhea virus (PEDV)                      | Pig vaccine     | Assessment of the safety and efficacy of an attenuated live vaccine based on highly virulent genotype 2b porcine epidemic diarrhea virus in nursing piglets                                                                                                                                                                                                               | [89] | R&D | No  |
| 40 | Newcastle disease virus (NDV)                               | Poultry vaccine | Development of G7M mutated NDV as a promising genotype VII candidate vaccine                                                                                                                                                                                                                                                                                              | [90] | R&D | Yes |
| 41 | Nervous necrosis virus (NNV)                                | Fish vaccine    | Investigation of humoral and cellular immunity responses of bath and oral vaccinations with BEI-inactivated NNV                                                                                                                                                                                                                                                           | [91] | BR  | No  |
| 42 | H5 highly pathogenic avian influenza virus (HPAIV)          | -               | Evaluation of different vaccine technologies for efficacy: 1) inactivated reverse genetic laboratory-generated virus encoding a clade 2.3.4.4 H5 hemagglutinin (HA) gene (rgH5), 2) recombinant turkey herpesvirus encoding a clade 2.2. H5 HA (rHVT-AI), and 3) recombinant replication-deficient alphavirus RNA particle vaccine encoding a clade 2.3.4.4 H5 HA (RP-H5) | [92] | BR  | Yes |
| 43 | Porcine reproductive and respiratory syndrome virus (PRRSV) | Pig vaccine     | Experimental testing of an experimental inactivated PRRSV vaccine                                                                                                                                                                                                                                                                                                         | [93] | R&D | No  |
| 44 | Viral hemorrhagic septicemia virus (VHSV)                   | Fish vaccine    | Assessment of effectivity of differently treated VHSV vaccines in olive flounder                                                                                                                                                                                                                                                                                          | [94] | BR  | No  |

|    |                                                                       |                                               |                                                                                                                                                                                               |       |     |     |
|----|-----------------------------------------------------------------------|-----------------------------------------------|-----------------------------------------------------------------------------------------------------------------------------------------------------------------------------------------------|-------|-----|-----|
| 45 | Viral hemorrhagic septicemia virus (VHSV)                             | Fish vaccine                                  | Development of a GM VHSV vaccine against virulent VHSV in olive flounder                                                                                                                      | [95]  | R&D | Yes |
| 46 | Viral hemorrhagic septicemia virus (VHSV)                             | Fish vaccine                                  | Development of a further developed GM VHSV vaccine in olive flounder                                                                                                                          | [96]  | R&D | Yes |
| 47 | Viral hemorrhagic septicemia virus (VHSV)                             | Fish vaccine (viral replicon particles)       | Development of a viral replicon particles rVHSV- $\Delta$ TM variant which inhibits the replication of wild-type VHSV when co-infected                                                        | [97]  | R&D | Yes |
| 48 | Viral hemorrhagic septicemia virus (VHSV)                             | -                                             | Review of VHSV mutants-based vaccines, particularly on the enhancement of immunogenicity, vaccine administration routes, safety to environments to support practical use in aquaculture farms | [98]  | BR  | -   |
| 49 | Viral hemorrhagic septicemia virus (VHSV)                             | Fish vaccine (viral replicon particles)       | Development rVHSV- $\Delta$ G a single cycle virus whose progenies are not infectious as a prophylactic vaccine                                                                               | [99]  | R&D | Yes |
| 50 | Orange-spotted grouper nervous necrosis virus (OGNNV) - Betanodavirus | Fish vaccine / Virus like particles           | Demonstration that vaccination with OGNNV VLP induces humoral immune responses in orange-spotted grouper, <i>Epinephelus coioides</i>                                                         | [100] | R&D | No  |
| 51 | Reticuloendotheliosis virus (REV)                                     | Poultry vaccine                               | Demonstration of potential value of DNA vaccination in the prevention of REV infection and of codon optimization and GM DNA vaccines                                                          | [101] | BR  | Yes |
| 52 | Tembusu virus (TMUV) - Baculovirus pFastBacDual vector                | Poultry vaccine / virus-like particles (VLPs) | Demonstration that chimeric VLPs E protein of the TMUV and HA2 protein of the H3N2 avian influenza virus is a candidate vaccine to control TMUV infections in young duck                      | [102] | R&D | Yes |
| 53 | Fowl adenovirus (FAdV)                                                | -                                             | Comprehensive review of FAdV-4, including its epidemiology, pathogenesis, diagnostic detection, and vaccine strategies                                                                        | [103] | BR  | -   |
| 54 | Baculovirus                                                           | Pig vaccine / virus-like                      | Baculovirus (rAc-Cap-SS) porcine circovirus-like particles as a novel subunit candidate vaccine for preventing PMWS                                                                           | [104] | R&D | Yes |

|    |                                                                                  |                        |                                                                                                                                                                                                               |       |     |     |
|----|----------------------------------------------------------------------------------|------------------------|---------------------------------------------------------------------------------------------------------------------------------------------------------------------------------------------------------------|-------|-----|-----|
|    |                                                                                  | particles (VLPs)       |                                                                                                                                                                                                               |       |     |     |
| 55 | Baculovirus                                                                      | Cattle subunit vaccine | Silkworm baculovirus produced protein vaccine against foot-and-mouth disease virus (FMDV) Asia I/HNK/CHA/05                                                                                                   | [105] | R&D | Yes |
| 56 | Pseudorabies virus (PRV)                                                         | Pig vaccine            | Assessment of deletion-variant, attenuated PRV strain                                                                                                                                                         | [106] | R&D | No  |
| 57 | Infectious bronchitis virus (IBV)                                                | Poultry vaccine        | Development of a highly attenuated nephropathogenic K2 IBV vaccine, with increased levels of protection against IBV                                                                                           | [107] | R&D | No  |
| 58 | Porcine epidemic diarrhea virus (PEDV)                                           | Pig vaccine            | Characterisation of attenuated PEDV variants                                                                                                                                                                  | [108] | BR  | No  |
| 59 | Highly pathogenic porcine reproductive and respiratory syndrome virus (HP-PRRSV) | Pig vaccine            | Characterisation of live modified HP-PRRSV vaccine strains to regain infectivity                                                                                                                              | [109] | BR  | No  |
| 60 | African swine fever virus (ASFV)                                                 | Pig vaccine            | Characterisation of the infectivity of ASFV $\Delta$ MGF100-1R deletion strain                                                                                                                                | [110] | BR  | Yes |
| 61 | Adenovirus                                                                       | Pig vector vaccine     | Assessment of protective potential of 2 adenovirus-vectored cocktails containing ASFV antigens                                                                                                                | [111] | R&D | Yes |
| 62 | Adenovirus                                                                       | Pig vector vaccine     | Demonstration that rAd-F1-Hsp70 has potent mucosal adjuvanticity in pigs, and is a candidate ASFV mucosal vaccine                                                                                             | [112] | R&D | Yes |
| 63 | Pseudorabies virus (PRV)                                                         | Pig vaccine            | Development of a PRV candidate strain in which the protein kinase UL13 gene was deleted was constructed with the CRISPR/Cas9 system based on the recombinant pseudorabies virus (PRV) ZJ01- $\Delta$ gI/gE/TK | [113] | R&D | Yes |
| 64 | Pseudorabies virus (PRV)                                                         | Pig vaccine            | Demonstrate of oral immunization against PRV infection in wild boar with Bartha vaccine                                                                                                                       | [114] | BR  | No  |

|    |                                        |                                      |                                                                                                                                                                                                       |       |     |     |
|----|----------------------------------------|--------------------------------------|-------------------------------------------------------------------------------------------------------------------------------------------------------------------------------------------------------|-------|-----|-----|
| 65 | Baculovirus                            | Sea Lion virus-like particles (VLPs) | Development of VLP with epitopes of Steller sea lion viruses V810 and V1415                                                                                                                           | [115] | BR  | Yes |
| 66 | Kenyan sheep pox virus (KSPV)          | Sheep vaccine                        | Assessment of effectivity of Kenyan sheep pox virus strain vaccine (KS1 O-180) against natural lumpy skin disease (LSD) infection under field conditions                                              | [116] | BR  | No  |
| 67 | Lentivirus-based gene delivery system  | Pig subunit marker vaccine           | Development of Subunit vaccine to decrease vertical transmission of classical swine fever virus                                                                                                       | [117] | R&D | Yes |
| 68 | Bovine viral diarrhea virus (BVDV)     | Cattle vaccine                       | Assessment of effects of multivalent modified-live virus vaccine containing noncytopathic BVDV administered off-label to pregnant cattle                                                              | [118] | BR  | No  |
| 69 | Turkey herpesvirus (HVT)               | Poultry vector ND vaccine            | Assessment of immunity provided by a recombinant ND vaccine using HVT virus as vector (rHVT-ND)                                                                                                       | [119] | R&D | Yes |
| 70 | African swine fever virus (ASFV)       | -                                    | Study to identify of ASFV antigens that induce a protective immune response                                                                                                                           | [120] | BR  | Yes |
| 71 | Classical Swine Fever virus (CSFV)     | Pig vaccine                          | Assessment of E2-CD154 subunit candidate vaccine in pregnant pigs                                                                                                                                     | [121] | R&D | No  |
| 72 | Bovine viral diarrhea virus (BVDV)     | Cattle vaccine                       | Comparison of immune responses of calves exposed to a single dose of Bovela® bovine viral diarrhea virus (BVDV) live double deleted vaccine or a field strain virus (FSV) of BVDV type 2 (strain 890) | [122] | BR  | Yes |
| 73 | Infectious Bursal Disease Virus (IBDV) | Poultry subunit DNA vaccine          | Examination of the protective efficacy of a subunit DNA vaccine against IBDV infection in chickens                                                                                                    | [123] | R&D | Yes |
| 74 | Foot and mouth disease virus (FMDV)    | Cattle vaccine                       | Report of the construction and characterization of an infectious cDNA clone of the Indian vaccine strain of FMDV serotype O, IND-R2/75.                                                               | [124] | BR  | Yes |
| 75 | Infectious Bursal Disease              | Poultry subunit                      | Assessment of a live IBDV vaccine strain, IBDV MB-1                                                                                                                                                   | [125] | BR  | No  |

|    |                                                 |                  |                                                                                                                                                                                                  |       |     |     |
|----|-------------------------------------------------|------------------|--------------------------------------------------------------------------------------------------------------------------------------------------------------------------------------------------|-------|-----|-----|
|    | Virus (IBDV)                                    | DNA vaccine      |                                                                                                                                                                                                  |       |     |     |
| 76 | Marek's disease virus (MDV)                     | Poultry vaccines | Review discussing the current status of MD vaccines and their use as vector vaccines to control important viral poultry diseases                                                                 | [126] | BR  | -   |
| 77 | Bovine viral diarrhea virus (BVDV)              | Cattle vaccine   | Construction of a new chimeric pestivirus "CP7_E1E2alf_TLA", based on the infectious cDNA of BVDV strain CP7                                                                                     | [127] | R&D | Yes |
| 78 | African swine fever virus (ASFV)                | -                | Review focusing on the challenges surrounding ASF vaccine design and development and existing knowledge gaps                                                                                     | [128] | BR  | -   |
| 79 | Turkey Herpesvirus (HVT)                        | Poultry vaccine  | Assessment of a recombinant HVT-IBD vector vaccine and an intermediate plus live IBDV vaccine                                                                                                    | [129] | R&D | Yes |
| 80 | Newcastle disease virus (NDV)                   | Poultry vaccine  | Development of a thermostable, attenuated vaccine candidate strain NDV/rHR09                                                                                                                     | [130] | R&D | Yes |
| 81 | African swine fever virus (ASFV)                | -                | Review of information on the pathogenesis of ASF virus strains, the immune response to infection and prospects for developing vaccines                                                           | [131] | BR  | -   |
| 82 | Highly pathogenic avian influenza virus (HPAIV) | Poultry vaccine  | Assessment of an inactivated influenza vaccine prepared from a non-pathogenic H5N1 AIV, A/duck/Hokkaido/Vac-3/2007 (H5N1)                                                                        | [132] | R&D | Yes |
| 83 | Foot-and-mouth disease virus (FMDV)             | Cattle vaccine   | Evaluation of newly developed FMDV vaccine strains against the emerging serotype FMDV Asia1                                                                                                      | [133] | R&D | Yes |
| 84 | Indian Peste des Petits Ruminants virus (PPRV)  | Cattle vaccine   | Assessment of virological and antigenic characteristics of two Indian Peste des Petits Ruminants (PPR) vaccine viruses namely "PPRV-Sungri/96" and "PPRV-AR/87"                                  | [134] | BR  | No  |
| 85 | Marek's disease virus (MDV)                     | Poultry vaccine  | Assessment of a deletion variant of the GM MDV variant GX0101, a field strain of MDV with a naturally occurring insertion of the reticuloendotheliosis virus long terminal repeat (LTR) fragment | [135] | R&D | Yes |

|    |                                                             |                    |                                                                                                                                                                                |       |     |     |
|----|-------------------------------------------------------------|--------------------|--------------------------------------------------------------------------------------------------------------------------------------------------------------------------------|-------|-----|-----|
| 86 | Marek's disease virus (MDV)                                 | Poultry vaccine    | Development and assessment of a double deletion mutant MDV lacking virus-encoded meq and lorf9 as candidate vaccine                                                            | [136] | R&D | Yes |
| 87 | Newcastle disease virus (NDV), Tembusu virus (DTMUV)        | Poultry vaccine    | Assessment of a candidate vaccine aGM/prM + E against NDV and DTMUV transmissions in waterfowl raising areas in China                                                          | [137] | R&D | Yes |
| 88 | Porcine reproductive and respiratory syndrome virus (PRRSV) | Pig vaccine        | Assessment of the efficacy of a novel BEI-inactivated PRRSV candidate vaccine in pigs                                                                                          | [138] | R&D | No  |
| 89 | Classical swine fever virus (CSFV)                          | Pig vaccine        | Examination of the induction of a strong T cellular response to confer a solid protection upon DNA-E2 vaccination against CSFV.                                                | [139] | R&D | Yes |
| 90 | Classical swine fever virus (CSFV)                          | Pig vaccine        | Assessment of a tandem-repeat multiple-epitope recombinant vaccine can protect pigs from CSFV challenge                                                                        | [140] | R&D | Yes |
| 91 | African swine fever virus (ASFV)                            | -                  | Review of the research progress on ASFV in recent years                                                                                                                        | [141] | BR  | -   |
| 92 | Rabies virus (RV)                                           | (Wild) dog vaccine | Applications of RV vector LBNSE expressing foreign antigens have shown considerable promise as vaccines against viral and bacteria diseases, e.g. canine distemper virus (CDV) | [142] | R&D | Yes |
| 93 | African swine fever virus (ASFV)                            | -                  | Overview of the current knowledge in innate and adaptive immune responses elicited by ASFV infection and different kinds of vaccine candidates                                 | [143] | BR  | -   |
| 94 | Duck Orthoreovirus                                          | -                  | Examination of effects of duck reovirus (DRV/GX-Y7) on waterfowl                                                                                                               | [144] | BR  | No  |
| 95 | Porcine epidemic diarrhea virus (PEDV)                      | Pig vaccine        | Investigation of the characteristics of a field strain of PEDV (PEDV strain SH) to develop candidate vaccines                                                                  | [145] | BR  | No  |
| 96 | Newcastle disease virus                                     | Poultry DNA        | Assessment of immunization of chickens with Salmonella with pYL58 a NDV                                                                                                        | [146] | BR  | Yes |

|     |                                           |                        |                                                                                                                                                                                    |       |     |     |
|-----|-------------------------------------------|------------------------|------------------------------------------------------------------------------------------------------------------------------------------------------------------------------------|-------|-----|-----|
|     | (NDV)                                     | vaccine                | based DNA vaccine construct                                                                                                                                                        |       |     |     |
| 97  | Infectious laryngotracheitis virus (ILTV) | Poultry vector vaccine | Study of potential utility of ILTV-ΔgC-F as a bivalent candidate vaccine against both infectious laryngotracheitis and Newcastle disease                                           | [147] | BR  | Yes |
| 98  | Porcine circovirus type 2 (PCV2)          | Pig vaccine            | Evaluation of the efficacy of a new vaccine combining inactivated PCV2 and Mycoplasma hyorhinis                                                                                    | [148] | R&D | No  |
| 99  | Infectious salmon anemia virus (ISAV)     | Fish vaccine           | A SAV-based replicon encoding the ISAV hemagglutinin-esterase, pSAV/HE, is an efficacious vaccine against infectious salmon anemia (ISA)                                           | [149] | R&D | Yes |
| 100 | Pseudorabies virus (PRV)                  | Pig vaccine            | Construction of a herpesvirus based bivalent vaccine with high-level expression of the ORF2 gene encoding the major antigen protein Cap of porcine circovirus type 2 (PCV2) in PRV | [150] | R&D | Yes |
| 101 | Avian infectious bronchitis virus (AIBV)  | -                      | Characterization of a novel recombinant AIBV derived from GI-1, GI-13, GI-28, and GI-19 strains                                                                                    | [151] | BR  | No  |
| 102 | Foot-and-mouth disease virus (FMDV)       | Cattle DNA vaccine     | Assessment of FMD DNA vaccine with IL-18 formulated with PLGA nanoparticles                                                                                                        | [152] | R&D | Yes |
| 103 | Pseudorabies virus (PRV)                  | Pig vector vaccine     | Evaluation of PRV-based vaccine against Porcine circovirus type 3 (PCV3)                                                                                                           | [153] | R&D | Yes |
| 104 | Largemouth bass virus (LMBV)              | Fish DNA vaccine       | A DNA vaccine expressing LMBV Major capsid protein might represent a potential LMBV vaccine candidate                                                                              | [154] | R&D | Yes |
| 105 | Foot-and-mouth disease virus (FMDV)       | Cattle vaccine         | Construction of a modified FMD vaccine strain, C3 Resende-R                                                                                                                        | [155] | R&D | Yes |
| 106 | Singapore grouper iridovirus (SGIV)       | Fish vaccine           | The DNA vaccine construct pcDNA3.1-19R could induce protective immunity in grouper, and is a potential vaccine candidate for controlling SGIV disease                              | [156] | R&D | Yes |
| 107 | Rabbit hemorrhagic                        | Rabbit DNA             | Construction of a novel DNA vaccine (pcDNA-VP60) expressing the RHDV capsid                                                                                                        | [157] | R&D | Yes |

|     |                                                             |                                     |                                                                                                                                                                                   |       |     |     |
|-----|-------------------------------------------------------------|-------------------------------------|-----------------------------------------------------------------------------------------------------------------------------------------------------------------------------------|-------|-----|-----|
|     | disease virus (RHDV)                                        | vaccine                             | protein (VP60)                                                                                                                                                                    |       |     |     |
| 108 | Bovine viral diarrhea virus (BVDV) type 2                   | Cattle vaccine                      | Development of BVDV-2ΔNpro mutant which represents a promising candidate for an efficacious future live vaccine                                                                   | [158] | R&D | Yes |
| 109 | Tilapia lake virus (TiLV)                                   | Fish DNA vaccine                    | Efficacy by TiLV VP20 with different prime-boost vaccination regimens was evaluated in tilapia (DNA prime-protein boost immunization strategy was better than a solo vaccination) | [159] | R&D | Yes |
| 110 | Porcine circovirus type-2 (PCV2)                            | Pig vaccine                         | Evaluation of an inactivated PCV2-vaccine covalently conjugated with chitosan oligosaccharide                                                                                     | [160] | R&D | No  |
| 111 | Newcastle disease virus (NDV)                               | Poultry vaccine                     | Development of GM NDV variants (rClon30-chGM-CSF and rClon30-flic) conferring enhanced protection in chicks                                                                       | [161] | R&D | Yes |
| 112 | Turbot reddish body iridovirus (TRBIV)                      | Fish nanoparticle-based DNA vaccine | Chitosan nanoparticles were promising carriers for plasmid DNA vaccine pDNA-CS-NPs through oral vaccination                                                                       | [162] | R&D | Yes |
| 113 | Porcine reproductive and respiratory syndrome virus (PRRSV) | Pig vaccine                         | Study providing guidance for the choice and use of PRRSV modified live virus vaccines to control NADC30-like virus infection in the field                                         | [163] | BR  | No  |
| 114 | Infectious bronchitis virus (IBV)                           | Poultry vaccine                     | IBV strain H120 was successfully rescued as infectious clone by reverse genetics and a mutated variant constructed for vaccine use                                                | [164] | R&D | Yes |
| 115 | Grass carp reovirus                                         | Fish DNA vaccine                    | Evaluation of single walled carbon nanotubes (SWCNTs) as carriers for DNA vaccines for intramuscular injection                                                                    | [165] | R&D | Yes |
| 116 | Foot-and-mouth disease virus (FMDV)                         | Cattle vaccine                      | Construction of a FLAGG tagged virus as candidate FMD vaccine which can be differentiated in vaccinated animals                                                                   | [166] | BR  | Yes |



**Table S3:** List of publications identified for GM viruses as agents against plant pathogens, indicating their status of development and the use of GM viruses  
Status: Status of development; BR: Basic research; R&D: Research and development

| No. | Virus                                     | Purpose of the application  | Purpose of the Study                                                                               | Reference (study) | Status     | GMO |
|-----|-------------------------------------------|-----------------------------|----------------------------------------------------------------------------------------------------|-------------------|------------|-----|
| 1   | Citrus tristeza virus (CTV)               | GM citrus plant development | GM citrus with CTV resistance                                                                      | [167]             | R&D        | No  |
| 2   | Citrus tristeza virus (CTV)               | GM CTV as vector            | Development of GM CTV-based expression vectors for plants                                          | [168]             | R&D        | Yes |
| 3   | -                                         | -                           | Vector-borne <i>Liberibacter</i> disease in plants                                                 | [169]             | - (Review) | No  |
| 4   | Citrus tristeza virus (CTV)               | -                           | Effects of CTV strains on plants                                                                   | [170]             | BR         | No  |
| 5   | Citrus tristeza virus (CTV)               | GM CTV as vector            | GM CTV infected plants as trap crops for <i>Liberibacter</i> insect vector <i>Diaphorina citri</i> | [171]             | R&D        | Yes |
| 6   | Citrus yellow vein clearing virus (CYVCV) | -                           | Detection and management of CYVCV in citrus plants                                                 | [172]             | - (Review) | No  |
| 7   | Citrus tristeza virus (CTV)               | -                           | Assessment of CYVCV interactions with infected citrus plants                                       | [173]             | BR         | No  |
| 8   | Citrus yellow vein clearing virus (CYVCV) | -                           | Serological detection of CYVCV in citrus plants                                                    | [174]             | BR         | No  |
| 9   | Citrus psorosis virus (CPsV)              | -                           | Immunodiagnosics of CPsV isolates                                                                  | [175]             | BR         | No  |

**Table S4:** List of publications identified for GM viruses for the use as biocontrol agents, indicating their status of development and the use of GM viruses  
Status: Status of development; BR: Basic research; R&D: Research and development; FT: Field trial

| No. | Virus                                                        | Purpose of the application                       | Purpose of the Study                                                                                                                                                            | Reference (study) | Status | GMO |
|-----|--------------------------------------------------------------|--------------------------------------------------|---------------------------------------------------------------------------------------------------------------------------------------------------------------------------------|-------------------|--------|-----|
| 1   | Spodoptera litura nucleopolyhedrovirus (SpltNPV)             | Biocontrol of agricultural pests                 | Biocontrol of <i>Spodoptera litura</i> as a primary insect pest of cotton in Pakistan due to reductions in pesticide use in GM cotton, resistant to <i>Helicoverpa armigera</i> | [176]             | R&D    | No  |
| 2   | Spodoptera frugiperda multiple nucleopolyhedrovirus (SfMNPV) | Biocontrol of agricultural pests                 | Basic research of infectivity of SfMNPV occlusion bodies for <i>Spodoptera frugiperda</i>                                                                                       | [177]             | BR     | Yes |
| 3   | Chrysodeixis chalcites nucleopolyhedrovirus (ChchNPV)        | Biocontrol of agricultural pests                 | Assessment of ChchSNPV-TF1 as a biological insecticide for control of <i>C. chalcites</i> in banana crops                                                                       | [178]             | R&D    | No  |
| 4   | A. ipsilon multiple nucleopolyhedrovirus (AgipMNPV)          | Biocontrol of agricultural pests                 | Assessment of susceptibility of a grass-feeding caterpillar to a baculovirus                                                                                                    | [179]             | BR     | No  |
| 5   | Cryphonectria hypovirus (CHV1)                               | Hypovirulence as remedy to fungal blight disease | Detection of CHV1 virus in corticolous mites that are vectors of hypovirulence in blighted chestnut <i>Castanea sativa</i>                                                      | [180]             | BR     | No  |
| 6   | Spodoptera exigua multiple nucleopolyhedrovirus (SeMNPV)     | Biocontrol of agricultural pests                 | Assessment of key pathogenicity and virulence traits of SeMNPV isolates according to their principal transmission strategy                                                      | [181]             | BR     | No  |
| 7   | Phthorimaea operculella granulovirus (PhopGV)                | Biocontrol of agricultural pests                 | Development of a bioinsecticide based on PhopGV isolates against the pest Guatemala potato tuber moth                                                                           | [182]             | R&D    | No  |

|    |                                                                                    |                                             |                                                                                                                                              |       |    |     |
|----|------------------------------------------------------------------------------------|---------------------------------------------|----------------------------------------------------------------------------------------------------------------------------------------------|-------|----|-----|
| 8  | Condylorrhiza vestigialis<br>nucleopolyhedrovirus<br>(CoveNPV)                     | Biocontrol of forest pests                  | Research aimed at the use of CoveNPV in integrated pest management programs in Poplar crop                                                   | [183] | BR | No  |
| 9  | Culex flavivirus (CxFV)                                                            | Identification of mosquito-associated virus | Characterisation of CxFV, a novel insect-specific flavivirus                                                                                 | [184] | BR | No  |
| 10 | Nucleopolyhedroviruses                                                             | Biocontrol of agricultural pests            | Study of virus-host specificity to aid the application of baculovirus in protein expression systems and the development of biocontrol agents | [14]  | BR | No  |
| 11 | Junonia coenia densovirus<br>(JcDV)                                                | Biocontrol of agricultural pests            | Research on the potential of JcDV as a biological control agent against pests such as <i>S. frugiperda</i>                                   | [185] | BR | No  |
| 12 | Anticarsia gemmatalis<br>multiple<br>nucleopolyhedrovirus<br>(AgMNPV) i            | Biocontrol of agricultural pests            | Assessment of AgMNPV as a viral insecticide                                                                                                  | [186] | BR | No  |
| 13 | Listeriaphage P100                                                                 | Biocontrol of food pathogens                | Assessment of resistance development in <i>Listeria monocytogenes</i> against phage-based control agents                                     | [187] | BR | No  |
| 14 | Spodoptera frugiperda<br>multiple nucleocapsid<br>nucleopolyhedrovirus<br>(SfMNPV) | Biocontrol of agricultural pest             | Assessment of SfMNPV isolates as the basis for a biopesticide for the control of <i>S. frugiperda</i> in Mexico                              | [188] | FT | No  |
| 15 | Baculoviruses                                                                      | Biocontrol of agricultural pest             | Study on regulation of the neuronal activity of host caterpillars by baculoviruses                                                           | [189] | BR | Yes |
| 16 | L. obfuscat multiple<br>nucleopolyhedrovirus                                       | Biocontrol of tree / forest pests           | Assessment of application of LyobMNPV against the host populations of Indian gypsy moth on apple and willow                                  | [190] | FT | No  |

|    |                                                                         |                                       |                                                                                                                                                |       |     |     |
|----|-------------------------------------------------------------------------|---------------------------------------|------------------------------------------------------------------------------------------------------------------------------------------------|-------|-----|-----|
|    | (LyobMNPV)                                                              |                                       |                                                                                                                                                |       |     |     |
| 17 | Baculovirus                                                             | Biocontrol of agricultural pests      | Assessment of earthworm activity on the distribution and dynamics of baculovirus occlusion body populations in soil                            | [191] | BR  | No  |
| 18 | <i>H. armigera</i> single nucleopolyhedrovirus (HaSNPV)                 | Biocontrol of agricultural pests      | Research into virus-mediated manipulation of host physiology                                                                                   | [192] | BR  | Yes |
| 19 | Salivary gland hytrosaviruses (SGHVs)                                   | Biocontrol of agricultural pests      | Assessment of different SGHVs as potential biocontrol agent for tsetse vector control or as agents that may jeopardize tsetse mass rearing     | [193] | BR  | No  |
| 20 | <i>Glossina pallidipes</i> salivary gland hytrosaviruses virus (GpSGHV) | Protection of mass rearing facilities | Development of potential targets for novel and sustainable molecular-based antiviral strategies to control viral infections in tsetse colonies | [194] | R&D | No  |
| 21 | Baculovirus                                                             | Biocontrol of agricultural pests      | Detection of covert baculovirus infections in the eastern spruce budworm, <i>Choristoneura fumiferana</i>                                      | [195] | BR  | No  |
| 22 | <i>Spodoptera exigua</i> multiple nucleopolyhedrovirus (SeMNPV)         | Biocontrol of agricultural pests      | Assessment of activity of SeMNPV for biocontrol in Amaranth ( <i>Amaranthus hypocondriacus</i> L.) cultures                                    | [196] | R&D | No  |
| 23 | Muscavirus (MdSGHV)                                                     | Biocontrol / Sterilizing agent        | Assessment of MdSGHV as a sterilizing agent to control house fly populations                                                                   | [197] | BR  | No  |
| 24 | <i>C. capitata</i> noravirus (CcaNV).                                   | Protection of mass rearing facilities | Covert infections by CcaNV may impair the fitness of sterile Mediterranean fruit flies produced by SIT program                                 | [198] | R&D | No  |
| 25 | Chilo iridescent virus (CIV)                                            | Biocontrol of agricultural pests      | Insertion of a toxin gene into CIV provides opportunities to control a wide range of pest insects, such as weevils, using an iridovirus        | [199] | R&D | Yes |

|    |                                                                  |                                  |                                                                                                                                                                                       |       |                                                |     |
|----|------------------------------------------------------------------|----------------------------------|---------------------------------------------------------------------------------------------------------------------------------------------------------------------------------------|-------|------------------------------------------------|-----|
| 26 | Iflavirus (EVV-1)                                                | Biocontrol of agricultural pests | Development of virus-based strategies against phytoplasma disease transmitted by the leafhopper vector <i>Euscelidius variegatus</i>                                                  | [200] | BR                                             | No  |
| 27 | Salmonid birnavirus (IPNV)                                       | Biocontrol / Hypoinfectivity     | Use of non-pathogenic IPNV to elicit resistance to VHSV superinfection in aquacultured fish species                                                                                   | [201] | BR                                             | No  |
| 28 | Lymantria dispar multiple nucleopolyhedrovirus-BNP (LdMNPV-BNP)  | Biocontrol of forest pest        | Assessment of LdMNPV-BNP as an active component of biopesticides that can be used during forest integrated pest management                                                            | [202] | BR                                             | No  |
| 29 | -                                                                | Biocontrol / immunocontraception | Assessment of biological control strategies in vertebrate pest management in Australia in case studies of rabbits, cane toads and carp                                                | [203] | Overview biocontrol vertebrate pests Australia | -   |
| 30 | Spodoptera exigua multiple nucleopolyhedrovirus (SeMNPV)         | Biocontrol of agricultural pests | Development of gene knockout variants as SeMNPV candidate agents with significantly increased OB pathogenicity                                                                        | [204] | BR                                             | Yes |
| 31 | Spodoptera litura nucleopolyhedrovirus (SpltNPV)                 | Biocontrol of agricultural pests | Isolation of faster killing isolates as good candidates for biological control of <i>S. litura</i> in Pakistan                                                                        | [205] | BR                                             | No  |
| 32 | Spodoptera frugiperda multiple nucleopolyhedrovirus (SfMNPV-NIC) | Biocontrol of agricultural pests | Assessment of gene knockout variants of SfMNPV-NIC with modified oral transmission efficacy                                                                                           | [206] | BR                                             | Yes |
| 33 | Nucleopolyhedrovirus NPV (AgMNPV-79 or SfMNPV-6nd)               | Biocontrol of agricultural pests | Assessment of the advantages and disadvantages of the simultaneous applications of NPV and <i>M. rileyi</i> for the management of either <i>A. gemmatilis</i> or <i>S. frugiperda</i> | [207] | BR                                             | No  |

|    |                                                               |                                  |                                                                                                                                  |       |    |     |
|----|---------------------------------------------------------------|----------------------------------|----------------------------------------------------------------------------------------------------------------------------------|-------|----|-----|
| 34 | Lymantria mathura nucleopolyhedrovirus (LymaNPV)              | Biocontrol of forest pests       | Study on the basis of the interaction between <i>L. mathura</i> and LymaNPV                                                      | [208] | BR | No  |
| 35 | Entomopoxviruses (EPVs)                                       | Biocontrol of agricultural pests | Analysis of potential candidate isolates to control tortricid pests                                                              | [209] | BR | No  |
| 36 | Helicoverpa armigera single nucleopolyhedrovirus (HearNPV)    | Biocontrol of agricultural pests | Study of HearNPV interactions with host immunity to aid agricultural pest control                                                | [210] | BR | No  |
| 37 | Bacteriophage LPST144                                         | Biocontrol of food pathogens     | Assessment of bacteriophage LPST144 and its endolysin as potential antibacterial agents for Salmonella control in food industry  | [211] | BR | No  |
| 38 | Autographa californica multiple nucleopolyhedrovirus (AcMNPV) | Biocontrol of agricultural pests | A serial passage experiment shows long-term maintenance of a recombinant in serial passage and suggests an ecosystem safety risk | [212] | BR | Yes |

## References

1. Ahammed, G.J.; Li, X.; Wan, H.; Zhou, G.; Cheng, Y. SIWRKY81 reduces drought tolerance by attenuating proline biosynthesis in tomato. *Scientia Horticulturae* **2020**, *270*, 109444, doi:10.1016/j.scienta.2020.109444.
2. Liu, Y.; Schiff, M.; Marathe, R.; Dinesh-Kumar, S.P. Tobacco Rar1, EDS1 and NPR1/NIM1 like genes are required for N-mediated resistance to tobacco mosaic virus. *Plant J.* **2002**, *30*, 415–429, doi:10.1046/j.1365-313x.2002.01297.x.
3. Ahammed, G.J.; Li, X.; Yang, Y.; Liu, C.; Zhou, G.; Wan, H.; Cheng, Y. Tomato WRKY81 acts as a negative regulator for drought tolerance by modulating guard cell H<sub>2</sub>O<sub>2</sub>-mediated stomatal closure. *Environmental and Experimental Botany* **2020**, *171*, 103960, doi:10.1016/j.envexpbot.2019.103960.
4. Alatorre-García, T.A.; Fonseca-Coronado, S.; González-Candelas, F. Homologous recombination as a mechanism of genetic changes in bovine parainfluenza-3 virus. *Veterinary Microbiology* **2021**, *261*, 109185, doi:10.1016/j.vetmic.2021.109185.
5. Ali, A.M.; Lee, J.M.; Yoshida, M.; Sakashita, K.; Torii, J.; Kusakabe, T.; Hirashima, A. Expression and characterization of a recombinant Drosophila tyramine- $\beta$ -hydroxylase in silkworm infected with recombinant baculovirus. *Journal of Asia-Pacific Entomology* **2012**, *15*, 567–572, doi:10.1016/j.aspen.2012.06.004.
6. Motohashi, T.; Shimojima, T.; Fukagawa, T.; Maenaka, K.; Park, E.Y. Efficient large-scale protein production of larvae and pupae of silkworm by Bombyx mori nuclear polyhedrosis virus bacmid system. *Biochemical and Biophysical Research Communications* **2005**, *326*, 564–569, doi:10.1016/j.bbrc.2004.11.060.
7. Bahieldin, A.; Alqarni, D.A.; Atef, A.; Gadalla, N.O.; Al-matary, M.; Edris, S.; Al-Kordy, M.A.; Makki, R.M.; Al-Doss, A.A.; Sabir, J.S.; et al. Suppression of PCD-related genes affects salt tolerance in Arabidopsis. *Comptes Rendus Biologies* **2016**, *339*, 105–114, doi:10.1016/j.crvi.2016.02.004.
8. Burch-Smith, T.M.; Schiff, M.; Liu, Y.; Dinesh-Kumar, S.P. Efficient virus-induced gene silencing in Arabidopsis. *Plant Physiol.* **2006**, *142*, 21–27, doi:10.1104/pp.106.084624.
9. Velásquez, A.C.; Chakravarthy, S.; Martin, G.B. Virus-induced gene silencing (VIGS) in Nicotiana benthamiana and tomato. *J. Vis. Exp.* **2009**, doi:10.3791/1292.
10. Bahramnejad, B.; Erickson, L.R.; Goodwin, P.H. Induction of expression and increased susceptibility due to silencing a 4,5-DOPA dioxygenase extradiol-like gene of Nicotiana benthamiana in the interaction with the hemibiotrophic pathogens, Colletotrichum destructivum, Colletotrichum orbiculare or Pseudomonas syringae pv. tabaci. *Plant Science* **2010**, *178*, 147–157, doi:10.1016/j.plantsci.2009.10.007.
11. Bejai, S.; Fridborg, I.; Ekbom, B. Varied response of Spodoptera littoralis against Arabidopsis thaliana with metabolically engineered glucosinolate profiles. *Plant Physiology and Biochemistry* **2012**, *50*, 72–78, doi:10.1016/j.plaphy.2011.07.014.
12. Cao, X.; Huang, Y.; Xia, D.; Qiu, Z.; Shen, X.; Guo, X.; Zhao, Q. BmNPV-miR-415 up-regulates the expression of TOR2 via Bmo-miR-5738. *Saudi Journal of Biological Sciences* **2017**, *24*, 1614–1619, doi:10.1016/j.sjbs.2015.09.020.
13. Chen, A.; Xia, D.; Qiu, Z.; Gao, P.; Tang, S.; Shen, X.; Zhu, F.; Zhao, Q. Expression of a vitelline membrane protein, BmVMP23, is repressed by bmo-miR-1a-3p in silkworm, Bombyx mori. *FEBS Letters* **2013**, *587*, 970–975, doi:10.1016/j.febslet.2013.02.030.
14. Chen, Y.-W.; Wu, C.-P.; Wu, T.-C.; Wu, Y.-L. Analyses of the transcriptome of Bombyx mori cells infected with either BmNPV or AcMNPV. *Journal of Asia-Pacific Entomology*

2018, 21, 37–45, doi:10.1016/j.aspen.2017.10.009.

15. CHEN, B.; ZHANG, Y.; Yang, J.; Zhang, M.; Ma, Q.; Wang, X.; Ma, Z. The G-protein  $\alpha$  subunit GhGPA positively regulates *Gossypium hirsutum* resistance to *Verticillium dahliae* via induction of SA and JA signaling pathways and ROS accumulation. *The Crop Journal* **2021**, 9, 823–833, doi:10.1016/j.cj.2020.09.008.
16. Gao, X.; Wheeler, T.; Li, Z.; Kenerley, C.M.; He, P.; Shan, L. Silencing GhNDR1 and GhMKK2 compromises cotton resistance to *Verticillium* wilt. *Plant J.* **2011**, 66, 293–305, doi:10.1111/j.1365-3113X.2011.04491.x.
17. Deng, C.; ZHANG, F.; Wang, J.; Li, Y.; Huang, H.; Dai, S. Tobacco Rattle Virus-induced Phytoene Desaturase (PDS) Silencing in *Centaurea cyanus*. *Horticultural Plant Journal* **2021**, 7, 159–166, doi:10.1016/j.hpj.2020.08.002.
18. Dong, Y.; Burch-Smith, T.M.; Liu, Y.; Mamillapalli, P.; Dinesh-Kumar, S.P. A ligation-independent cloning tobacco rattle virus vector for high-throughput virus-induced gene silencing identifies roles for NbMADS4-1 and -2 in floral development. *Plant Physiol.* **2007**, 145, 1161–1170, doi:10.1104/pp.107.107391.
19. Embregts, C.; Rigauddau, D.; Tacchi, L.; Pijlman, G.P.; Kampers, L.; Vesely, T.; Pokorová, D.; Boudinot, P.; Wiegertjes, G.F.; Forlenza, M. Vaccination of carp against SVCV with an oral DNA vaccine or an insect cells-based subunit vaccine. *Fish & Shellfish Immunology* **2019**, 85, 66–77, doi:10.1016/j.fsi.2018.03.028.
20. Gao, S.; Wang, N.; Yang, J.; Sun, J.; Wang, Y.; Xia, D.; Tian, J.; Zhao, Y.; Feng, Y.; Zhou, Y.; et al. Development and evaluation of indirect double-antibody sandwich ELISA for rapid detection of Salmonid Alphavirus using Baculoviridae expressed E1 Protein. *Aquaculture* **2021**, 544, 737081, doi:10.1016/j.aquaculture.2021.737081.
21. Gwak, W.-S.; Kim, H.-S.; Bae, J.-S.; Kim, T.-H.; Bae, S.-M.; Woo, S.-D. Development of a novel enhanced baculovirus expression vector via promoter combination. *Journal of Asia-Pacific Entomology* **2020**, 23, 909–914, doi:10.1016/j.aspen.2020.07.016.
22. Chikako Ono; Tomonori Nakatsukasa; Yasuyuki Nishijima; Shin-ichiro Asano; Ken Sahara; Hisanori Bando. Construction of the BmNPV T3 Bacmid System and Its Application to the Functional Analysis of BmNPV he65. *J. Insect Biotechnol. Sericol.* **2007**, 76, 3\_161-3\_167, doi:10.11416/jibs.76.3\_161.
23. Hsieh, M.-H.; Lu, H.-C.; Pan, Z.-J.; Yeh, H.-H.; Wang, S.-S.; Chen, W.-H.; Chen, H.-H. Optimizing virus-induced gene silencing efficiency with Cymbidium mosaic virus in *Phalaenopsis* flower. *Plant Science* **2013**, 201-202, 25–41, doi:10.1016/j.plantsci.2012.11.003.
24. Lu, H.-C.; Chen, H.-H.; Tsai, W.-C.; Chen, W.-H.; Su, H.-J.; Chang, D.C.-N.; Yeh, H.-H. Strategies for functional validation of genes involved in reproductive stages of orchids. *Plant Physiol.* **2007**, 143, 558–569, doi:10.1104/pp.106.092742.
25. Huang, Y.; Li, T.; Xu, Z.-S.; Wang, F.; Xiong, A.-S. Six NAC transcription factors involved in response to TYLCV infection in resistant and susceptible tomato cultivars. *Plant Physiology and Biochemistry* **2017**, 120, 61–74, doi:10.1016/j.plaphy.2017.09.020.
26. Kwak, J.S.; Kim, M.S.; Kim, K.H. Generation of a recombinant viral hemorrhagic septicemia virus (VHSV) expressing olive flounder (*Paralichthys olivaceus*) interferon- $\gamma$  and its effects on type I interferon response and virulence. *Fish & Shellfish Immunology* **2017**, 68, 530–535, doi:10.1016/j.fsi.2017.07.052.
27. Kim, M.S.; Kim, D.S.; Kim, K.H. Generation and characterization of NV gene-knockout recombinant viral hemorrhagic septicemia virus (VHSV) genotype IVa. *Dis. Aquat. Organ.* **2011**, 97, 25–35, doi:10.3354/dao02394.



28. Li, T.; Hu, J.; Sun, Y.; Li, B.; Zhang, D.; Li, W.; Liu, J.; Li, D.; Gao, C.; Zhang, Y.; et al. Highly efficient heritable genome editing in wheat using an RNA virus and bypassing tissue culture. *Molecular Plant* **2021**, *14*, 1787–1798, doi:10.1016/j.molp.2021.07.010.
29. Hu, J.; Li, S.; Li, Z.; Li, H.; Song, W.; Zhao, H.; Lai, J.; Xia, L.; Li, D.; Zhang, Y. A barley stripe mosaic virus-based guide RNA delivery system for targeted mutagenesis in wheat and maize. *Mol. Plant Pathol.* **2019**, *20*, 1463–1474, doi:10.1111/mpp.12849.
30. Li, Y.; Zhang, X.; Jiang, J.; Zhao, T.; Xu, X.; Yang, H.; Li, J. Virus-induced gene silencing of SIPYL4 decreases the drought tolerance of tomato. *Horticultural Plant Journal* **2022**, *8*, 361–368, doi:10.1016/j.hpj.2021.06.005.
31. Ellison, E.E.; Nagalakshmi, U.; Gamo, M.E.; Huang, P.; Dinesh-Kumar, S.; Voytas, D.F. Multiplexed heritable gene editing using RNA viruses and mobile single guide RNAs. *Nature Plants* **2020**, *6*, 620–624, doi:10.1038/s41477-020-0670-y.
32. LIU, M.; LIU, L.; WU, H.; KANG, B.; GU, Q. Mapping subgenomic promoter of coat protein gene of Cucumber green mottle mosaic virus. *Journal of Integrative Agriculture* **2020**, *19*, 153–163, doi:10.1016/S2095-3119(19)62647-X.
33. Liu, L.; PENG, B.; Zhang, Z.; Wu, Y.; Miras, M.; Aranda, M.A.; Gu, Q. Exploring Different Mutations at a Single Amino Acid Position of Cucumber green mottle mosaic virus Replicase to Attain Stable Symptom Attenuation. *Phytopathology®* **2017**, *107*, 1080–1086, doi:10.1094/PHYTO-03-17-0107-R.
34. LUO, S.; KONG, L.; Peng, H.; HUANG, W.; CUI, J.; Liu, J.; QIAO, F.; JIAN, H.; PENG, D. Golden Promise barley (*Hordeum vulgare*) is a suitable candidate model host for investigation interaction with *Heterodera avenae*. *Journal of Integrative Agriculture* **2017**, *16*, 1537–1546, doi:10.1016/S2095-3119(16)61595-2.
35. Yuan, C.; Li, C.; Yan, L.; Jackson, A.O.; Liu, Z.; Han, C.; Yu, J.; Li, D. A high throughput barley stripe mosaic virus vector for virus induced gene silencing in monocots and dicots. *PLoS One* **2011**, *6*, e26468, doi:10.1371/journal.pone.0026468.
36. Ma, N.; Liu, C.; Yang, W.; Shen, H. PAP3 Regulates Stamen but Not Petal Development in *Capsicum annuum* L. *Horticultural Plant Journal* **2016**, *2*, 91–96, doi:10.1016/j.hpj.2016.02.009.
37. NIU, E.; CAI, C.; BAO, J.; WU, S.; ZHAO, L.; GUO, W. Up-regulation of a homeodomain-leucine zipper gene HD-1 contributes to trichome initiation and development in cotton. *Journal of Integrative Agriculture* **2019**, *18*, 361–371, doi:10.1016/S2095-3119(18)61914-8.
38. Qu, Z.; Li, M.; An, R.; Dai, H.; Yu, Y.; Li, C.; Cao, C.; Meng, Y.; Wang, J.; Gao, M. Self-assembled BPIV3 nanoparticles can induce comprehensive immune responses and protection against BPIV3 challenge by inducing dendritic cell maturation in mice. *Veterinary Microbiology* **2022**, *268*, 109415, doi:10.1016/j.vetmic.2022.109415.
39. Shah, S.R.A.; Tao, L.; Haijuan, C.; Lei, L.; Zheng, Z.; Junming, L.; Du Yongchen. Age-related Resistance and the Defense Signaling Pathway of Ph-3 Gene Against *Phytophthora infestans* in Tomatoes. *Horticultural Plant Journal* **2015**, *1*, 70–76, doi:10.16420/j.issn.2095-9885.2015-0019.
40. Chen, Y.-Y.; Lin, Y.-M.; Chao, T.-C.; Wang, J.-F.; Liu, A.-C.; Ho, F.-I.; Cheng, C.-P. Virus-induced gene silencing reveals the involvement of ethylene-, salicylic acid- and mitogen-activated protein kinase-related defense pathways in the resistance of tomato to bacterial wilt. *Physiol. Plant.* **2009**, *136*, 324–335, doi:10.1111/j.1399-3054.2009.01226.x.
41. Shen, J.; Si, W.; Wu, Y.; Xu, Y.; Wang, J.; Cheng, T.; Zhang, Q.; Pan, H. Establishment and Verification of An Efficient Virus-induced Gene Silencing System in *Forsythia*.

*Horticultural Plant Journal* **2021**, 7, 81–88, doi:10.1016/j.hpj.2020.09.001.

42. Soni, N.; Altartouri, B.; Hegde, N.; Duggavathi, R.; Nazarian-Firouzabadi, F.; Kushalappa, A.C. TaNAC032 transcription factor regulates lignin-biosynthetic genes to combat Fusarium head blight in wheat. *Plant Science* **2021**, 304, 110820, doi:10.1016/j.plantsci.2021.110820.
43. Cakir, C.; Scofield, S. Evaluating the ability of the barley stripe mosaic virus-induced gene silencing system to simultaneously silence two wheat genes. *Cereal Research Communications* **2008**, 36, 217–222, doi:10.1556/CRC.36.2008.Suppl.B.18.
44. WANG, Z.; BAO, Y.; PEI, T.; WU, T.; DU, X.; HE, M.; WANG, Y.; LIU, Q.; YANG, H.; JIANG, J.; et al. Silencing the SLB3 transcription factor gene decreases drought stress tolerance in tomato. *Journal of Integrative Agriculture* **2020**, 19, 2699–2708, doi:10.1016/S2095-3119(20)63350-0.
45. Wu, M.; Hu, Q.; Zhou, Y.; Guo, H. Development of a VP28-pseudotyped baculovirus expression system for efficient gene transfer in penaeid shrimps. *Aquaculture* **2021**, 541, 736741, doi:10.1016/j.aquaculture.2021.736741.
46. Xu, H.; Xu, L.; Yang, P.; Cao, Y.; Tang, Y.; He, G.; Yuan, S.; Lei, J.; Ming, J. Virus-induced Phytoene Desaturase (PDS) Gene Silencing Using Tobacco Rattle Virus in Lilium × formolongi. *Horticultural Plant Journal* **2019**, 5, 31–38, doi:10.1016/j.hpj.2018.10.002.
47. Xu, W.-Y.; Fang, X.-D.; Cao, Q.; Gao, Q.; Gao, D.-M.; Qiao, J.-H.; Zang, Y.; Xie, L.; Ding, Z.-H.; Yang, Y.-Z.; et al. A cytorhabdovirus-based expression vector in Nilaparvata lugens, Laodelphax striatellus, and Sogatella furcifera. *Insect Biochemistry and Molecular Biology* **2022**, 140, 103703, doi:10.1016/j.ibmb.2021.103703.
48. Gao, Q.; Xu, W.-Y.; Yan, T.; Fang, X.-D.; Cao, Q.; Zhang, Z.-J.; Ding, Z.-H.; WANG, Y.; Wang, X.-B. Rescue of a plant cytorhabdovirus as versatile expression platforms for planthopper and cereal genomic studies. *New Phytol.* **2019**, 223, 2120–2133, doi:10.1111/nph.15889.
49. Zhou, P.; Peng, J.; Zeng, M.; Wu, L.; Fan, Y.; Zeng, L. Virus-induced gene silencing (VIGS) in Chinese narcissus and its use in functional analysis of NtMYB3. *Horticultural Plant Journal* **2021**, 7, 565–572, doi:10.1016/j.hpj.2021.04.009.
50. Zhu, Y.-P.; Li, C.; Wan, X.-Y.; Yang, Q.; Xie, G.S.; Huang, J. Delivery of plasmid DNA to shrimp hemocytes by Infectious hypodermal and hematopoietic necrosis virus (IHHNV) nanoparticles expressed from a baculovirus insect cell system. *Journal of Invertebrate Pathology* **2019**, 166, 107231, doi:10.1016/j.jip.2019.107231.
51. Anis, E.; Holford, A.L.; Galyon, G.D.; Wilkes, R.P. Antigenic analysis of genetic variants of Canine distemper virus. *Veterinary Microbiology* **2018**, 219, 154–160, doi:10.1016/j.vetmic.2018.03.014.
52. Anziliero, D.; Santos, C.; Brum, M.; Weiblen, R.; Chowdhury, S.I.; Flores, E.F. A recombinant bovine herpesvirus 5 defective in thymidine kinase and glycoprotein E is immunogenic for calves and confers protection upon homologous challenge and BoHV-1 challenge. *Veterinary Microbiology* **2011**, 154, 14–22, doi:10.1016/j.vetmic.2011.03.019.
53. Bálint, Á.; Farsang, A.; Szeredi, L.; Zádori, Z.; Belák, S. Recombinant feline coronaviruses as vaccine candidates confer protection in SPF but not in conventional cats. *Veterinary Microbiology* **2014**, 169, 154–162, doi:10.1016/j.vetmic.2013.10.015.
54. Bannai, H.; Nemoto, M.; Tsujimura, K.; Yamanaka, T.; Kokado, H.; Kondo, T.; Matsumura, T. Comparison of protective efficacies between intranasal and intramuscular vaccination of horses with a modified live equine herpesvirus type-1 vaccine. *Veterinary Microbiology* **2018**, 222, 18–24, doi:10.1016/j.vetmic.2018.06.015.

55. Bristol, L.S.; Duhamel, G.E.; Zinckgraf, J.W.; Crabb, J.H.; Nydam, D.V. Effect of passive antibodies derived from rotavirus-like particles on neonatal calf diarrhea caused by rotavirus in an oral challenge model. *Journal of Dairy Science* **2021**, *104*, 11922–11930, doi:10.3168/jds.2020-19834.
56. Buonocore, F.; Nuñez-Ortiz, N.; Picchietti, S.; Randelli, E.; Stocchi, V.; Guerra, L.; Toffan, A.; Pascoli, F.; Fausto, A.M.; Mazzini, M.; et al. Vaccination and immune responses of European sea bass (*Dicentrarchus labrax* L.) against betanodavirus. *Fish & Shellfish Immunology* **2019**, *85*, 78–84, doi:10.1016/j.fsi.2017.11.039.
57. Campos, F.S.; Dezen, D.; Antunes, D.A.; Santos, H.F.; Arantes, T.S.; Cenci, A.; Gomes, F.; Lima, F.; Brito, W.; Filho, H.; et al. Efficacy of an inactivated, recombinant bovine herpesvirus type 5 (BoHV-5) vaccine. *Veterinary Microbiology* **2011**, *148*, 18–26, doi:10.1016/j.vetmic.2010.08.004.
58. Cao, S.; Guo, Q.; Wang, Y. Inhibition of highly pathogenic porcine reproductive and respiratory syndrome virus replication by recombinant pseudorabies virus-mediated RNA interference in piglets. *Veterinary Microbiology* **2015**, *181*, 212–220, doi:10.1016/j.vetmic.2015.10.016.
59. Cao, Z.; Liu, S.; Nan, H.; Zhao, K.; Xu, X.; Wang, G.; Ji, H.; Chen, H. Immersion immunization with recombinant baculoviruses displaying cyprinid herpesvirus 2 membrane proteins induced protective immunity in gibel carp. *Fish & Shellfish Immunology* **2019**, *93*, 879–887, doi:10.1016/j.fsi.2019.08.036.
60. Chai, W.; Liu, Z.; Sun, Z.; Su, L.; Zhang, C.; Huang, L. Efficacy of two porcine reproductive and respiratory syndrome (PRRS) modified-live virus (MLV) vaccines against heterologous NADC30-like PRRS virus challenge. *Veterinary Microbiology* **2020**, *248*, 108805, doi:10.1016/j.vetmic.2020.108805.
61. Chen, N.; Li, X.; Xiao, Y.; Li, S.; Zhu, J. Characterization of four types of MLV-derived porcine reproductive and respiratory syndrome viruses isolated in unvaccinated pigs from 2016 to 2020. *Research in Veterinary Science* **2021**, *134*, 102–111, doi:10.1016/j.rvsc.2020.12.007.
62. Chen, Z.-Y.; Lei, X.-Y.; Zhang, Q.-Y. The antiviral defense mechanisms in mandarin fish induced by DNA vaccination against a rhabdovirus. *Veterinary Microbiology* **2012**, *157*, 264–275, doi:10.1016/j.vetmic.2011.12.025.
63. Choi, H.-Y.; Lee, S.-H.; Ahn, S.-H.; Choi, J.-C.; Jeong, J.-Y.; Lee, B.-J.; Kang, Y.-L.; Hwang, S.-S.; Lee, J.-K.; Lee, S.-W.; et al. A chimeric porcine reproductive and respiratory syndrome virus (PRRSV)-2 vaccine is safe under international guidelines and effective both in experimental and field conditions. *Research in Veterinary Science* **2021**, *135*, 143–152, doi:10.1016/j.rvsc.2021.01.012.
64. Choi, M.G.; Kim, M.S.; Choi, T.-J.; Kim, K.H. Effect of CXCL12-expressing viral hemorrhagic septicemia virus replicon particles on leukocytes migration and vaccine efficacy in olive flounder (*Paralichthys olivaceus*). *Fish & Shellfish Immunology* **2019**, *89*, 378–383, doi:10.1016/j.fsi.2019.04.018.
65. Costa, J.Z.; Thompson, K.D. Understanding the interaction between Betanodavirus and its host for the development of prophylactic measures for viral encephalopathy and retinopathy. *Fish & Shellfish Immunology* **2016**, *53*, 35–49, doi:10.1016/j.fsi.2016.03.033.
66. Cui, X.-Y.; Xia, D.-S.; Huang, X.-Y.; Tian, X.-X.; Wang, T.; YANG, Y.; Wang, G.; Wang, H.-W.; SUN, Y.; Xiao, Y.-H.; et al. Recombinant characteristics, pathogenicity, and viral shedding of a novel PRRSV variant derived from twice inter-lineage recombination. *Veterinary Microbiology* **2022**, *271*, 109476, doi:10.1016/j.vetmic.2022.109476.
67. Dar, P.A.; Suryanaryana, V.S.; Nagarajan, G.; Reddy, G.R.; Dechamma, H.J.; Kondabattula, G. DNA prime-protein boost strategy with replicase-based DNA vaccine against foot-and-mouth disease in bovine calves. *Veterinary Microbiology* **2013**, *163*, 62–70, doi:10.1016/j.vetmic.2012.12.017.

68. Dong, C.; Xiong, X.; Luo, Y.; Weng, S.; Wang, Q.; He, J. Efficacy of a formalin-killed cell vaccine against infectious spleen and kidney necrosis virus (ISKNV) and immunoproteomic analysis of its major immunogenic proteins. *Veterinary Microbiology* **2013**, *162*, 419–428, doi:10.1016/j.vetmic.2012.10.026.
69. Dortmans, J.C.; Peeters, B.P.; Koch, G. Newcastle disease virus outbreaks: Vaccine mismatch or inadequate application? *Veterinary Microbiology* **2012**, *160*, 17–22, doi:10.1016/j.vetmic.2012.05.003.
70. Eclercy, J.; Larcher, T.; Andraud, M.; Renson, P.; Bernard, C.; Bigault, L.; Ledevin, M.; Paboeuf, F.; Grasland, B.; Rose, N.; et al. PCV2 co-infection does not impact PRRSV MLV1 safety but enhances virulence of a PRRSV MLV1-like strain in infected SPF pigs. *Veterinary Microbiology* **2020**, *244*, 108656, doi:10.1016/j.vetmic.2020.108656.
71. Erfanmanesh, A.; Ghalyanchilangeroudi, A.; Nikaein, D.; Hosseini, H.; Mohajerfar, T. Evaluation of inactivated vaccine of the variant 2 (IS-1494 /GI-23) genotype of avian infectious bronchitis. *Comparative Immunology, Microbiology and Infectious Diseases* **2020**, *71*, 101497, doi:10.1016/j.cimid.2020.101497.
72. Es-sadeqy, Y.; Bamouh, Z.; Ennahli, A.; Safini, N.; El Mejdoub, S.; Omari Tadlaoui, K.; Gavrilov, B.; El Harrak, M. Development of an inactivated combined vaccine for protection of cattle against lumpy skin disease and bluetongue viruses. *Veterinary Microbiology* **2021**, *256*, 109046, doi:10.1016/j.vetmic.2021.109046.
73. Fan, L.; Wang, Y.; Jiang, N.; GAO, L.; Li, K.; Gao, Y.; Cui, H.; Pan, Q.; Liu, C.; Zhang, Y.; et al. A reassortment vaccine candidate of the novel variant infectious bursal disease virus. *Veterinary Microbiology* **2020**, *251*, 108905, doi:10.1016/j.vetmic.2020.108905.
74. Fan, S.; Wu, Y.; Wang, H.; Shang, Y.; Luo, Q.; Zhang, T.; Zhang, R.; Zhang, W.; Luo, L.; Shao, H.; et al. In-ovo Newcastle disease virus vaccine strain TS09-C protects commercial chickens against Newcastle disease in the presence of maternally derived antibodies. *Poultry Science* **2020**, *99*, 2438–2443, doi:10.1016/j.psj.2020.01.006.
75. FAN, Y.; ZHAO, Q.; ZHAO, Y.; ZOU, X.; ZHANG, Z.; WANG, Q.; NING, Y. Heterogeneity and Secondary Structure Analysis of 3' Untranslated Region in Classical Swine Fever Viruses. *Agricultural Sciences in China* **2011**, *10*, 142–148, doi:10.1016/S1671-2927(11)60316-7.
76. Frączyk, M.; Woźniakowski, G.; Kowalczyk, A.; Bocian, Ł.; Kozak, E.; Niemczuk, K.; Pejsak, Z. Evolution of African swine fever virus genes related to evasion of host immune response. *Veterinary Microbiology* **2016**, *193*, 133–144, doi:10.1016/j.vetmic.2016.08.018.
77. Freuling, C.M.; Müller, T.F.; Mettenleiter, T.C. Vaccines against pseudorabies virus (PrV). *Veterinary Microbiology* **2017**, *206*, 3–9, doi:10.1016/j.vetmic.2016.11.019.
78. Fu, Y.; Chen, Z.; Li, C.; Liu, G. Protective immune responses in ducklings induced by a suicidal DNA vaccine of the VP1 gene of duck hepatitis virus type 1. *Veterinary Microbiology* **2012**, *160*, 314–318, doi:10.1016/j.vetmic.2012.06.022.
79. Gao, F.; Jiang, Y.; Li, G.; Li, L.; Zhang, Y.; Yu, L.; Zheng, H.; Tong, W.; Zhou, Y.; Liu, C.; et al. Evaluation of immune efficacy of recombinant PRRSV vectored vaccine rPRRSV-E2 in piglets with maternal derived antibodies. *Veterinary Microbiology* **2020**, *248*, 108833, doi:10.1016/j.vetmic.2020.108833.
80. Gao, H.; Li, K.; GAO, L.; Qi, X.; Gao, Y.; Qin, L.; Wang, Y.; Wang, X. DNA prime–protein boost vaccination enhances protective immunity against infectious bursal disease virus in chickens. *Veterinary Microbiology* **2013**, *164*, 9–17, doi:10.1016/j.vetmic.2013.01.027.
81. Gao, H.; Wang, J.; Zhao, G.; Zhu, M.; He, Y.; Xin, A. Substitution 3A protein of foot-and-mouth disease virus of attenuated ZB strain rescued the viral replication and infection in bovine cells. *Research in Veterinary Science* **2020**, *128*, 145–152, doi:10.1016/j.rvsc.2019.11.001.

82. García, M. Current and future vaccines and vaccination strategies against infectious laryngotracheitis (ILT) respiratory disease of poultry. *Veterinary Microbiology* **2017**, *206*, 157–162, doi:10.1016/j.vetmic.2016.12.023.
83. Gong, Y.; Chen, T.; Feng, N.; Meng, X.; Sun, W.; Wang, T.; Zhao, Y.; Yang, S.; Song, X.; Li, W.; et al. A highly efficient recombinant canarypox virus-based vaccine against canine distemper virus constructed using the CRISPR/Cas9 gene editing method. *Veterinary Microbiology* **2020**, *251*, 108920, doi:10.1016/j.vetmic.2020.108920.
84. Guo, M.; Shi, W.; Wang, Y.; Wang, Y.; Chen, Y.; Li, D.; Ren, X.; Hua, X.; Tang, L.; Li, Y.; et al. Recombinant infectious hematopoietic necrosis virus expressing infectious pancreatic necrosis virus VP2 protein induces immunity against both pathogens. *Fish & Shellfish Immunology* **2018**, *78*, 187–194, doi:10.1016/j.fsi.2018.04.047.
85. Guo, X.; Zhou, Y.; Fu, X.; Lin, Q.; Liu, L.; Liang, H.; Niu, Y.; Li, N. Transcriptomic profiles reveal that inactivated iridovirus and rhabdovirus bivalent vaccine elicits robust adaptive immune responses against lethal challenge in marbled sleepy goby. *Fish & Shellfish Immunology* **2020**, *98*, 429–437, doi:10.1016/j.fsi.2020.01.047.
86. Han, K.; Zhao, D.; Liu, Y.; Huang, X.; Yang, J.; Liu, Q.; An, F.; Li, Y. Design and evaluation of a polytope construct with multiple B and T epitopes against Tembusu virus infection in ducks. *Research in Veterinary Science* **2016**, *104*, 174–180, doi:10.1016/j.rvsc.2015.09.011.
87. He, W.; Zhao, J.; Xing, G.; Li, G.; Wang, R.; Wang, Z.; Zhang, C.; Franzo, G.; Su, S.; Zhou, J. Genetic analysis and evolutionary changes of Porcine circovirus 2. *Molecular Phylogenetics and Evolution* **2019**, *139*, 106520, doi:10.1016/j.ympev.2019.106520.
88. Hu, F.; Li, Y.; Wang, Q.; Wang, G.; Zhu, B.; Wang, Y.; Zeng, W.; Yin, J.; Liu, C.; Bergmann, S.M.; et al. Carbon nanotube-based DNA vaccine against koi herpesvirus given by intramuscular injection. *Fish & Shellfish Immunology* **2020**, *98*, 810–818, doi:10.1016/j.fsi.2019.11.035.
89. Jang, G.; Won, H.; Lee, D.-U.; Noh, Y.-H.; Lee, S.-C.; Choi, H.-W.; Yoon, I.-J.; Lee, Y.J.; Sang Yoo, H.; Lee, C. Assessment of the safety and efficacy of an attenuated live vaccine based on highly virulent genotype 2b porcine epidemic diarrhea virus in nursing piglets. *Veterinary Microbiology* **2019**, *231*, 120–128, doi:10.1016/j.vetmic.2019.03.009.
90. Ji, Y.; Liu, T.; Du, Y.; Cui, X.; Yu, Q.; Wang, Z.; Zhang, J.; Li, Y.; Zhu, Q. A novel genotype VII Newcastle disease virus vaccine candidate generated by mutation in the L and F genes confers improved protection in chickens. *Veterinary Microbiology* **2018**, *216*, 99–106, doi:10.1016/j.vetmic.2018.01.021.
91. Kai, Y.-H.; Wu, Y.-C.; Chi, S.-C. Immune gene expressions in grouper larvae (*Epinephelus coioides*) induced by bath and oral vaccinations with inactivated betanodavirus. *Fish & Shellfish Immunology* **2014**, *40*, 563–569, doi:10.1016/j.fsi.2014.08.005.
92. Kapczynski, D.R.; Sylte, M.J.; Killian, M.L.; Torchetti, M.K.; Chrzastek, K.; Suarez, D.L. Protection of commercial turkeys following inactivated or recombinant H5 vaccine application against the 2015U.S. H5N2 clade 2.3.4.4 highly pathogenic avian influenza virus. *Veterinary Immunology and Immunopathology* **2017**, *191*, 74–79, doi:10.1016/j.vetimm.2017.08.001.
93. Karniychuk, U.U.; Saha, D.; Vanhee, M.; Geldhof, M.; Cornillie, P.; Caij, A.B.; Regge, N. de; Nauwynck, H.J. Impact of a novel inactivated PRRS virus vaccine on virus replication and virus-induced pathology in fetal implantation sites and fetuses upon challenge. *Theriogenology* **2012**, *78*, 1527–1537, doi:10.1016/j.theriogenology.2012.06.015.
94. Kim, H.J.; Park, J.S.; Choi, M.C.; Kwon, S.R. Comparison of the efficacy of Poly(I:C) immunization with live vaccine and formalin-killed vaccine against viral hemorrhagic septicemia virus (VHSV) in olive flounder (*Paralichthys olivaceus*). *Fish & Shellfish Immunology* **2016**, *48*, 206–211, doi:10.1016/j.fsi.2015.11.035.

95. Kim, M.S.; Kim, D.S.; Kim, K.H. Oral immunization of olive flounder (*Paralichthys olivaceus*) with recombinant live viral hemorrhagic septicemia virus (VHSV) induces protection against VHSV infection. *Fish & Shellfish Immunology* **2011**, *31*, 212–216, doi:10.1016/j.fsi.2011.05.003.
96. Kim, M.S.; Kim, K.H. Generation of recombinant viral hemorrhagic septicemia viruses (VHSVs) harboring G gene of hirame rhabdovirus (HIRRV) and their ability to induce serum neutralization activity in olive flounder (*Paralichthys olivaceus*). *Aquaculture* **2012**, *330–333*, 37–41, doi:10.1016/j.aquaculture.2011.12.018.
97. Kim, M.S.; Kim, K.H. Generation of VHSV replicon particles carrying transmembrane and C-terminal cytoplasmic region-deleted G gene (rVHSV-GΔTM) and comparison of vaccine efficacy with G gene-deleted VHSV (rVHSV-ΔG). *Fish & Shellfish Immunology* **2019**, *88*, 231–236, doi:10.1016/j.fsi.2019.02.048.
98. Kim, M.S.; Kim, K.H. Genetically engineered viral hemorrhagic septicemia virus (VHSV) vaccines. *Fish & Shellfish Immunology* **2019**, *95*, 11–15, doi:10.1016/j.fsi.2019.10.031.
99. Kim, M.S.; Park, J.S.; Kim, K.H. Generation of G gene-deleted viral hemorrhagic septicemia virus (VHSV) and evaluation of its vaccine potential in olive flounder (*Paralichthys olivaceus*). *Fish & Shellfish Immunology* **2015**, *45*, 666–671, doi:10.1016/j.fsi.2015.05.031.
100. Lai, Y.-X.; Jin, B.-L.; Xu, Y.; Huang, L.; Huang, R.-Q.; Zhang, Y.; Kwang, J.; He, J.-G.; Xie, J.-F. Immune responses of orange-spotted grouper, *Epinephelus coioides*, against virus-like particles of betanodavirus produced in *Escherichia coli*. *Veterinary Immunology and Immunopathology* **2014**, *157*, 87–96, doi:10.1016/j.vetimm.2013.10.003.
101. Li, K.; GAO, L.; Gao, H.; Qi, X.; Gao, Y.; Qin, L.; Wang, Y.; Wang, X. Protection of chickens against reticuloendotheliosis virus infection by DNA vaccination. *Veterinary Microbiology* **2013**, *166*, 59–67, doi:10.1016/j.vetmic.2013.04.031.
102. Li, L.; Zhang, Y.; Dong, J.; Zhang, J.; Zhang, C.; Qin, J.; Sun, M.; Xu, Z. Development of chimeric virus-like particles containing the E glycoprotein of duck Tembusu virus. *Veterinary Microbiology* **2019**, *238*, 108425, doi:10.1016/j.vetmic.2019.108425.
103. Li, P.H.; Zheng, P.P.; Zhang, T.F.; Wen, G.Y.; Shao, H.B.; Luo, Q.P. Fowl adenovirus serotype 4: Epidemiology, pathogenesis, diagnostic detection, and vaccine strategies. *Poultry Science* **2017**, *96*, 2630–2640, doi:10.3382/ps/pex087.
104. Li, W.; Wang, X.; Bai, J.; Ma, T.; Li, Z.; Li, Y.; Jiang, P. Construction and immunogenicity of recombinant porcine circovirus-like particles displaying somatostatin. *Veterinary Microbiology* **2013**, *163*, 23–32, doi:10.1016/j.vetmic.2012.11.045.
105. Li, Z.; Yin, X.; Yi, Y.; Li, X.; Li, B.; Lan, X.; Zhang, Z.; Liu, J. FMD subunit vaccine produced using a silkworm–baculovirus expression system: Protective efficacy against two type Asia1 isolates in cattle. *Veterinary Microbiology* **2011**, *149*, 99–103, doi:10.1016/j.vetmic.2010.10.022.
106. Liang, C.; Tong, W.; Zheng, H.; Liu, F.; Wu, J.; Li, G.; Zhou, E.; Tong, G. A high-temperature passaging attenuated Pseudorabies vaccine protects piglets completely against emerging PRV variant. *Research in Veterinary Science* **2017**, *112*, 109–115, doi:10.1016/j.rvsc.2017.02.008.
107. Lim, T.-H.; Kim, M.-S.; Jang, J.-H.; Lee, D.-H.; Park, J.-K.; Youn, H.-N.; Lee, J.-B.; Park, S.-Y.; Choi, I.-S.; Song, C.-S. Live attenuated nephropathogenic infectious bronchitis virus vaccine provides broad cross protection against new variant strains. *Poultry Science* **2012**, *91*, 89–94, doi:10.3382/ps.2011-01739.
108. Lin, C.-M.; Hou, Y.; Marthaler, D.G.; Gao, X.; Liu, X.; Zheng, L.; Saif, L.J.; Wang, Q. Attenuation of an original US porcine epidemic diarrhea virus strain PC22A via serial cell culture passage. *Veterinary Microbiology* **2017**, *201*, 62–71, doi:10.1016/j.vetmic.2017.01.015.

109. Liu, P.; Bai, Y.; Jiang, X.; Zhou, L.; Yuan, S.; Yao, H.; Yang, H.; Sun, Z. High reversion potential of a cell-adapted vaccine candidate against highly pathogenic porcine reproductive and respiratory syndrome. *Veterinary Microbiology* **2018**, *227*, 133–142, doi:10.1016/j.vetmic.2018.10.004.
110. Liu, Y.; Li, Y.; Xie, Z.; Ao, Q.; Di, D.; Yu, W.; Lv, L.; Zhong, Q.; Song, Y.; Liao, X.; et al. Development and in vivo evaluation of MGF100-1R deletion mutant in an African swine fever virus Chinese strain. *Veterinary Microbiology* **2021**, *261*, 109208, doi:10.1016/j.vetmic.2021.109208.
111. Lokhandwala, S.; Petrovan, V.; Popescu, L.; Sangewar, N.; Elijah, C.; Stoian, A.; Olcha, M.; Ennen, L.; Bray, J.; Bishop, R.P.; et al. Adenovirus-vectored African Swine Fever Virus antigen cocktails are immunogenic but not protective against intranasal challenge with Georgia 2007/1 isolate. *Veterinary Microbiology* **2019**, *235*, 10–20, doi:10.1016/j.vetmic.2019.06.006.
112. Lu, H.; Zhou, X.; Wu, Z.; Zhang, X.; Zhu, L.; Guo, X.; Zhang, Q.; Zhu, S.; Zhu, H.; Sun, H. Comparison of the mucosal adjuvant activities of two Toll-like receptor ligands for recombinant adenovirus-delivered African swine fever virus fusion antigens. *Veterinary Immunology and Immunopathology* **2021**, *239*, 110307, doi:10.1016/j.vetimm.2021.110307.
113. Lv, L.; Liu, X.; Jiang, C.; Wang, X.; Cao, M.; Bai, J.; Jiang, P. Pathogenicity and immunogenicity of a gI/gE/TK/UL13-gene-deleted variant pseudorabies virus strain in swine. *Veterinary Microbiology* **2021**, *258*, 109104, doi:10.1016/j.vetmic.2021.109104.
114. Maresch, C.; Lange, E.; Teifke, J.P.; Fuchs, W.; Klupp, B.; Müller, T.; Mettenleiter, T.C.; Vahlenkamp, T.W. Oral immunization of wild boar and domestic pigs with attenuated live vaccine protects against Pseudorabies virus infection. *Veterinary Microbiology* **2012**, *161*, 20–25, doi:10.1016/j.vetmic.2012.07.002.
115. McClenahan, S.D.; Bok, K.; Sosnovtsev, S.V.; Neill, J.D.; Burek, K.A.; Beckmen, K.B.; Smith, A.W.; Green, K.Y.; Romero, C.H. Expression and self-assembly of virus-like particles from two genotypes of marine vesiviruses and development of an ELISA for the detection of antibodies. *Veterinary Microbiology* **2010**, *142*, 184–192, doi:10.1016/j.vetmic.2009.09.057.
116. Molla, W.; Frankena, K.; Gari, G.; Jong, M.C. de. Field study on the use of vaccination to control the occurrence of lumpy skin disease in Ethiopian cattle. *Preventive Veterinary Medicine* **2017**, *147*, 34–41, doi:10.1016/j.prevetmed.2017.08.019.
117. Muñoz-González, S.; Sordo, Y.; Pérez-Simó, M.; Suárez, M.; Canturri, A.; Rodríguez, M.P.; Frías-Lepoureau, M.T.; Domingo, M.; Estrada, M.P.; Ganges, L. Efficacy of E2 glycoprotein fused to porcine CD154 as a novel chimeric subunit vaccine to prevent classical swine fever virus vertical transmission in pregnant sows. *Veterinary Microbiology* **2017**, *205*, 110–116, doi:10.1016/j.vetmic.2017.05.003.
118. Palomares, R.A.; Marley, S.M.; Givens, M.D.; Gallardo, R.A.; Brock, K.V. Bovine viral diarrhea virus fetal persistent infection after immunization with a contaminated modified-live virus vaccine. *Theriogenology* **2013**, *79*, 1184–1195, doi:10.1016/j.theriogenology.2013.02.017.
119. Palya, V.; Tatár-Kis, T.; Mató, T.; Felföldi, B.; Kovács, E.; Gardin, Y. Onset and long-term duration of immunity provided by a single vaccination with a turkey herpesvirus vector ND vaccine in commercial layers. *Veterinary Immunology and Immunopathology* **2014**, *158*, 105–115, doi:10.1016/j.vetimm.2013.11.008.
120. Pérez-Núñez, D.; Sunwoo, S.-Y.; Sánchez, E.G.; Haley, N.; García-Belmonte, R.; Nogal, M.; Morozov, I.; Madden, D.; Gaudreault, N.N.; Mur, L.; et al. Evaluation of a viral DNA-protein immunization strategy against African swine fever in domestic pigs. *Veterinary Immunology and Immunopathology* **2019**, *208*, 34–43, doi:10.1016/j.vetimm.2018.11.018.

121. Pérez-Pérez, D.; Sordo-Puga, Y.; Rodríguez-Moltó, M.P.; Sardina, T.; Santana, E.; Montero, C.; Ancizar, J.; Cabrera, Y.; Tuero, Á.; Naranjo, P.; et al. E2-CD154 vaccine candidate is safe and immunogenic in pregnant sows, and the maternal derived neutralizing antibodies protect piglets from classical swine fever virus challenge. *Veterinary Microbiology* **2021**, *260*, 109153, doi:10.1016/j.vetmic.2021.109153.
122. Platt, R.; Kesi, L.; Guidarini, C.; Wang, C.; Roth, J.A. Comparison of humoral and T-cell-mediated immune responses to a single dose of Bovela® live double deleted BVDV vaccine or to a field BVDV strain. *Veterinary Immunology and Immunopathology* **2017**, *187*, 20–27, doi:10.1016/j.vetimm.2017.03.003.
123. Pradhan, S.N.; Prince, P.R.; Madhumathi, J.; Arunkumar, C.; Roy, P.; Narayanan, R.B.; Antony, U. DNA vaccination with VP2 gene fragment confers protection against Infectious Bursal Disease Virus in Chickens. *Veterinary Microbiology* **2014**, *171*, 13–22, doi:10.1016/j.vetmic.2014.02.019.
124. Rajasekhar, R.; Hosamani, M.; Basagoudanavar, S.H.; Sreenivasa, B.P.; Tamil Selvan, R.P.; Saravanan, P.; Venkataramanan, R. Rescue of infective virus from a genome-length cDNA clone of the FMDV serotype O (IND-R2/75) vaccine strain and its characterization. *Research in Veterinary Science* **2013**, *95*, 291–297, doi:10.1016/j.rvsc.2013.01.026.
125. Ray, S.M.; Ashash, U.; Muthukumar, S. A field study on the evaluation of day-of-hatch and in grow-out application of live infectious bursal disease virus vaccine in broiler chickens. *Poultry Science* **2021**, *100*, 101252, doi:10.1016/j.psj.2021.101252.
126. Reddy, S.M.; Izumiya, Y.; Lupiani, B. Marek's disease vaccines: Current status, and strategies for improvement and development of vector vaccines. *Veterinary Microbiology* **2017**, *206*, 113–120, doi:10.1016/j.vetmic.2016.11.024.
127. Reimann, I.; Depner, K.; Utke, K.; Leifer, I.; Lange, E.; Beer, M. Characterization of a new chimeric marker vaccine candidate with a mutated antigenic E2-epitope. *Veterinary Microbiology* **2010**, *142*, 45–50, doi:10.1016/j.vetmic.2009.09.042.
128. Rock, D.L. Challenges for African swine fever vaccine development—“... perhaps the end of the beginning.”. *Veterinary Microbiology* **2017**, *206*, 52–58, doi:10.1016/j.vetmic.2016.10.003.
129. Roh, J.-H.; Kang, M.; Wei, B.; Yoon, R.-H.; Seo, H.-S.; Bahng, J.-Y.; Kwon, J.-T.; Cha, S.-Y.; Jang, H.-K. Efficacy of HVT-IBD vector vaccine compared to attenuated live vaccine using in-ovo vaccination against a Korean very virulent IBDV in commercial broiler chickens. *Poultry Science* **2016**, *95*, 1020–1024, doi:10.3382/ps/pew042.
130. Ruan, B.; Liu, Q.; Chen, Y.; Niu, X.; Wang, X.; Zhang, C.; Guo, M.; Zhang, X.; Cao, Y.; Wu, Y. Generation and evaluation of a vaccine candidate of attenuated and heat-resistant genotype VIII Newcastle disease virus. *Poultry Science* **2020**, *99*, 3437–3444, doi:10.1016/j.psj.2020.01.034.
131. Sánchez-Cordón, P.J.; Montoya, M.; Reis, A.L.; Dixon, L.K. African swine fever: A re-emerging viral disease threatening the global pig industry. *The Veterinary Journal* **2018**, *233*, 41–48, doi:10.1016/j.tvjl.2017.12.025.
132. Shichinohe, S.; Okamatsu, M.; Yamamoto, N.; Noda, Y.; Nomoto, Y.; Honda, T.; Takikawa, N.; Sakoda, Y.; Kida, H. Potency of an inactivated influenza vaccine prepared from a non-pathogenic H5N1 virus against a challenge with antigenically drifted highly pathogenic avian influenza viruses in chickens. *Veterinary Microbiology* **2013**, *164*, 39–45, doi:10.1016/j.vetmic.2013.01.041.
133. Shin, S.H.; Jo, H.; Ko, M.-K.; Choi, J.-H.; You, S.-H.; Jo, H.-E.; Lee, M.J.; Kim, S.-M.; Kim, B.; Park, J.-H. Antigenic properties of a novel vaccine strain for type Asia1 foot-and-



- mouth disease in pigs. *Veterinary Microbiology* **2020**, *248*, 108802, doi:10.1016/j.vetmic.2020.108802.
134. Singh, R.P.; De, U.K.; Pandey, K.D. Virological and antigenic characterization of two Peste des Petits Ruminants (PPR) vaccine viruses of Indian origin. *Comparative Immunology, Microbiology and Infectious Diseases* **2010**, *33*, 343–353, doi:10.1016/j.cimid.2008.12.003.
  135. Su, S.; Cui, N.; Li, J.; Sun, P.; Li, H.; Li, Y.; Cui, Z. Deletion of the BAC sequences from recombinant meq-null Marek's disease (MD) virus increases immunosuppression while maintaining protective efficacy against MD. *Poultry Science* **2016**, *95*, 1504–1512, doi:10.3382/ps/pew067.
  136. Sun, A.; Luo, J.; Wan, B.; Du, Y.; Wang, X.; Weng, H.; Cao, X.; Zhang, T.; Chai, S.; Zhao, D.; et al. Lorf9 deletion significantly eliminated lymphoid organ atrophy induced by meq-deleted very virulent Marek's disease virus. *Veterinary Microbiology* **2019**, *235*, 164–169, doi:10.1016/j.vetmic.2019.06.020.
  137. Sun, M.; Dong, J.; Li, L.; Lin, Q.; Sun, J.; Liu, Z.; Shen, H.; Zhang, J.; Ren, T.; Zhang, C. Recombinant Newcastle disease virus (NDV) expressing Duck Tembusu virus (DTMUV) pre-membrane and envelope proteins protects ducks against DTMUV and NDV challenge. *Veterinary Microbiology* **2018**, *218*, 60–69, doi:10.1016/j.vetmic.2018.03.027.
  138. Tabynov, K.; Sansyzbay, A.; Tulemissova, Z.; Tabynov, K.; Dhakal, S.; Samoltyrova, A.; Renukaradhya, G.J.; Mambetaliyev, M. Inactivated porcine reproductive and respiratory syndrome virus vaccine adjuvanted with Montanide™ Gel 01 ST elicits virus-specific cross-protective inter-genotypic response in piglets. *Veterinary Microbiology* **2016**, *192*, 81–89, doi:10.1016/j.vetmic.2016.06.014.
  139. Tarradas, J.; Argilaguet, J.M.; Rosell, R.; Nofrarías, M.; Crisci, E.; Córdoba, L.; Pérez-Martín, E.; Díaz, I.; Rodríguez, F.; Domingo, M.; et al. Interferon-gamma induction correlates with protection by DNA vaccine expressing E2 glycoprotein against classical swine fever virus infection in domestic pigs. *Veterinary Microbiology* **2010**, *142*, 51–58, doi:10.1016/j.vetmic.2009.09.043.
  140. Tian, H.; Hou, X.; Wu, J.; Chen, Y.; Shang, Y.; Yin, S.; Zhang, K.; Liu, X. A promising multiple-epitope recombinant vaccine against classical swine fever virus. *Veterinary Immunology and Immunopathology* **2014**, *157*, 59–64, doi:10.1016/j.vetimm.2013.10.014.
  141. Wang, F.; ZHANG, H.; Hou, L.; Yang, C.; Wen, Y. Advance of African swine fever virus in recent years. *Research in Veterinary Science* **2021**, *136*, 535–539, doi:10.1016/j.rvsc.2021.04.004.
  142. Wang, F.-X.; Zhang, S.-Q.; Zhu, H.-W.; Yang, Y.; Sun, N.; Tan, B.; Li, Z.-G.; Cheng, S.-P.; Fu, Z.F.; Wen, Y.-J. Recombinant rabies virus expressing the H protein of canine distemper virus protects dogs from the lethal distemper challenge. *Veterinary Microbiology* **2014**, *174*, 362–371, doi:10.1016/j.vetmic.2014.10.023.
  143. Wang, T.; Sun, Y.; Huang, S.; Qiu, H.-J. Multifaceted Immune Responses to African Swine Fever Virus: Implications for Vaccine Development. *Veterinary Microbiology* **2020**, *249*, 108832, doi:10.1016/j.vetmic.2020.108832.
  144. Wang, W.; Liang, J.; Shi, M.; Chen, G.; Huang, Y.; ZHANG, Y.; Zhao, Z.; Wang, M.; Li, M.; Mo, M.; et al. The diagnosis and successful replication of a clinical case of Duck Spleen Necrosis Disease: An experimental co-infection of an emerging unique reovirus and Salmonella indiana reveals the roles of each of the pathogens. *Veterinary Microbiology* **2020**, *246*, 108723, doi:10.1016/j.vetmic.2020.108723.

145. Wang, X.-W.; Wang, M.; Zhan, J.; Liu, Q.-Y.; Fang, L.; Zhao, C.; Jiang, P.; Li, Y.-F.; Bai, J. Pathogenicity and immunogenicity of a new strain of porcine epidemic diarrhea virus containing a novel deletion in the N gene. *Veterinary Microbiology* **2020**, *240*, 108511, doi:10.1016/j.vetmic.2019.108511.
146. Wang, Z.; WANG, Y.; Sun, C.; Zhao, X.; Sun, M.; Gao, X.; Jia, F.; Zhang, T.; Ge, C.; Zhang, X.; et al. Protection against genotype VII Newcastle disease virus challenge by a minicircle DNA vaccine coexpressing F protein and chicken IL-18 adjuvant. *Veterinary Microbiology* **2022**, *270*, 109474, doi:10.1016/j.vetmic.2022.109474.
147. Wei, X.; Shao, Y.; Han, Z.; Sun, J.; Liu, S. Glycoprotein-C-gene-deleted recombinant infectious laryngotracheitis virus expressing a genotype VII Newcastle disease virus fusion protein protects against virulent infectious laryngotracheitis virus and Newcastle disease virus. *Veterinary Microbiology* **2020**, *250*, 108835, doi:10.1016/j.vetmic.2020.108835.
148. Wei, Y.-W.; Zhu, H.-Z.; Huang, L.-P.; Xia, D.-L.; Wu, H.-L.; Bian, H.-Q.; Feng, L.; Liu, C.-M. Efficacy in pigs of a new inactivated vaccine combining porcine circovirus type 2 and Mycoplasma hyorhinis. *Veterinary Microbiology* **2020**, *242*, 108588, doi:10.1016/j.vetmic.2020.108588.
149. Wolf, A.; Hodneland, K.; Frost, P.; Hoeijmakers, M.; Rimstad, E. Salmonid alphavirus-based replicon vaccine against infectious salmon anemia (ISA): Impact of immunization route and interactions of the replicon vector. *Fish & Shellfish Immunology* **2014**, *36*, 383–392, doi:10.1016/j.fsi.2013.12.018.
150. Wu, X.; Wu, H.; Wang, H.; Luo, L.; Wang, J.; Wu, B.; He, Q.; Cao, G.; Lei, Y.; Chen, X.; et al. A new strategy to develop pseudorabies virus-based bivalent vaccine with high immunogenicity of porcine circovirus type 2. *Veterinary Microbiology* **2021**, *255*, 109022, doi:10.1016/j.vetmic.2021.109022.
151. Yan, W.; Qiu, R.; Wang, F.; Fu, X.; Li, H.; Cui, P.; Zhai, Y.; Li, C.; Zhang, L.; Gu, K.; et al. Genetic and pathogenic characterization of a novel recombinant avian infectious bronchitis virus derived from GI-1, GI-13, GI-28, and GI-19 strains in Southwestern China. *Poultry Science* **2021**, *100*, 101210, doi:10.1016/j.psj.2021.101210.
152. Yang, Y.; Teng, Z.; Lu, Y.; Luo, X.; Mu, S.; Ru, J.; Zhao, X.; Guo, H.; Ran, X.; Wen, X.; et al. Enhanced immunogenicity of foot and mouth disease DNA vaccine delivered by PLGA nanoparticles combined with cytokine adjuvants. *Research in Veterinary Science* **2021**, *136*, 89–96, doi:10.1016/j.rvsc.2021.02.010.
153. Yao, L.; Cheng, Y.; Wu, H.; Ghonaim, A.H.; Fan, S.; Li, W.; He, Q. The construction and immunogenicity analyses of a recombinant pseudorabies virus with porcine circovirus type 3 capsid protein co-expression. *Veterinary Microbiology* **2022**, *264*, 109283, doi:10.1016/j.vetmic.2021.109283.
154. Yi, W.; Zhang, X.; Zeng, K.; Xie, D.; Song, C.; Tam, K.; Liu, Z.; Zhou, T.; LI, W. Construction of a DNA vaccine and its protective effect on largemouth bass (*Micropterus salmoides*) challenged with largemouth bass virus (LMBV). *Fish & Shellfish Immunology* **2020**, *106*, 103–109, doi:10.1016/j.fsi.2020.06.062.
155. You, S.-H.; Jo, H.-E.; Choi, J.-H.; Ko, M.-K.; Shin, S.H.; Lee, M.J.; Kim, S.-M.; Kim, B.; Park, J.-H. Evaluation of novel inactivated vaccine for type C foot-and-mouth disease in cattle and pigs. *Veterinary Microbiology* **2019**, *234*, 44–50, doi:10.1016/j.vetmic.2019.05.016.
156. Yu, N.-T.; Zheng, X.; Liu, Z.-X. Protective immunity induced by DNA vaccine encoding viral membrane protein against SGIV infection in grouper. *Fish & Shellfish Immunology* **2019**, *92*, 649–654, doi:10.1016/j.fsi.2019.06.051.
157. Yuan, D.; Qu, L.; Liu, J.; Guo, D.; Jiang, Q.; Lin, H.; Si, C. DNA vaccination with a gene encoding VP60 elicited protective immunity against rabbit hemorrhagic disease virus. *Veterinary Microbiology* **2013**, *164*, 1–8, doi:10.1016/j.vetmic.2013.01.021.

158. Zemke, J.; König, P.; Mischkale, K.; Reimann, I.; Beer, M. Novel BVDV-2 mutants as new candidates for modified-live vaccines. *Veterinary Microbiology* **2010**, *142*, 69–80, doi:10.1016/j.vetmic.2009.09.045.
159. Zeng, W.; Wang, Y.; Chen, X.; Wang, Q.; Bergmann, S.M.; Yang, Y.; Wang, Y.; LI, B.; Lv, Y.; Li, H.; et al. Potency and efficacy of VP20-based vaccine against tilapia lake virus using different prime-boost vaccination regimens in tilapia. *Aquaculture* **2021**, *539*, 736654, doi:10.1016/j.aquaculture.2021.736654.
160. Zhang, G.; Jia, P.; Cheng, G.; Jiao, S.; Ren, L.; Ji, S.; Hu, T.; Liu, H.; Du, Y. Enhanced immune response to inactivated porcine circovirus type 2 (PCV2) vaccine by conjugation of chitosan oligosaccharides. *Carbohydrate Polymers* **2017**, *166*, 64–72, doi:10.1016/j.carbpol.2017.02.058.
161. Zhang, T.; Liu, Y.; Wang, H.; Zhang, X.; Zhu, S.; Xu, P.; Yin, J.; Ren, G.; Liu, J.; Li, D. Recombinant NDV expressing cytokines or fliC confers a quick immune response against NDV challenge and resistance to maternal antibody. *Veterinary Microbiology* **2016**, *196*, 107–117, doi:10.1016/j.vetmic.2016.10.008.
162. Zheng, F.; Liu, H.; Sun, X.; Zhang, Y.; Zhang, B.; Teng, Z.; Hou, Y.; Wang, B. Development of oral DNA vaccine based on chitosan nanoparticles for the immunization against reddish body iridovirus in turbot (*Scophthalmus maximus*). *Aquaculture* **2016**, *452*, 263–271, doi:10.1016/j.aquaculture.2015.11.013.
163. Zhou, L.; Yang, B.; Xu, L.; Jin, H.; Ge, X.; Guo, X.; Han, J.; Yang, H. Efficacy evaluation of three modified-live virus vaccines against a strain of porcine reproductive and respiratory syndrome virus NADC30-like. *Veterinary Microbiology* **2017**, *207*, 108–116, doi:10.1016/j.vetmic.2017.05.031.
164. Zhou, Y.S.; Zhang, Y.; Wang, H.N.; Fan, W.Q.; Yang, X.; Zhang, A.Y.; Zeng, F.Y.; Zhang, Z.K.; Cao, H.P.; Zeng, C. Establishment of reverse genetics system for infectious bronchitis virus attenuated vaccine strain H120. *Veterinary Microbiology* **2013**, *162*, 53–61, doi:10.1016/j.vetmic.2012.08.013.
165. Zhu, B.; Liu, G.-L.; Gong, Y.-X.; Ling, F.; Wang, G.-X. Protective immunity of grass carp immunized with DNA vaccine encoding the vp7 gene of grass carp reovirus using carbon nanotubes as a carrier molecule. *Fish & Shellfish Immunology* **2015**, *42*, 325–334, doi:10.1016/j.fsi.2014.11.026.
166. ZHU, Y.; ZOU, X.; BAO, H.; SUN, P.; MA, X.; LIU, Z.; FAN, H.; ZHAO, Q. Insertion site of FLAG on foot-and-mouth disease virus VP1 G-H loop affects immunogenicity of FLAG. *Journal of Integrative Agriculture* **2018**, *17*, 1655–1666, doi:10.1016/S2095-3119(18)61916-1.
167. CHENG, C.; YANG, J.; YAN, H.; BEI, X.; ZHANG, Y.; LU, Z.; ZHONG, G. Expressing p20 hairpin RNA of Citrus tristeza virus confers Citrus aurantium with tolerance/resistance against stem pitting and seedling yellow CTV strains. *Journal of Integrative Agriculture* **2015**, *14*, 1767–1777, doi:10.1016/S2095-3119(14)60937-0.
168. El-Mohtar, C.; Dawson, W.O. Exploring the limits of vector construction based on Citrus tristeza virus. *Virology* **2014**, *448*, 274–283, doi:10.1016/j.virol.2013.10.017.
169. Huang, W.; Reyes-Caldas, P.; Mann, M.; Seifbarghi, S.; Kahn, A.; Almeida, R.P.; Béven, L.; Heck, M.; Hogenhout, S.A.; Coaker, G. Bacterial Vector-Borne Plant Diseases: Unanswered Questions and Future Directions. *Molecular Plant* **2020**, *13*, 1379–1393, doi:10.1016/j.molp.2020.08.010.
170. Killiny, N.; Hijaz, F.; Harper, S.J.; Dawson, W.O. Effects of Citrus tristeza closterovirus infection on phloem sap and released volatile organic compounds in Citrus macrophylla. *Physiological and Molecular Plant Pathology* **2017**, *98*, 25–36, doi:10.1016/j.pmpp.2017.03.003.
171. Killiny, N.; Nehela, Y.; George, J.; Rashidi, M.; Stelinski, L.L.; Lapointe, S.L. Phytoene desaturase-silenced citrus as a trap crop with multiple cues to attract Diaphorina citri, the vector of Huanglongbing. *Plant Science* **2021**, *308*, 110930, doi:10.1016/j.plantsci.2021.110930.

172. Liu, C.; Liu, H.; Hurst, J.; Timko, M.P.; Zhou, C. Recent Advances on Citrus yellow vein clearing virus in Citrus. *Horticultural Plant Journal* **2020**, *6*, 216–222, doi:10.1016/j.hpj.2020.05.001.
173. Liu, Y.; Wang, G.; Wang, Z.; Yang, F.; Wu, G.; HONG, N. Identification of differentially expressed genes in response to infection of a mild Citrus tristeza virus isolate in Citrus aurantifolia by suppression subtractive hybridization. *Scientia Horticulturae* **2012**, *134*, 144–149, doi:10.1016/j.scienta.2011.11.022.
174. LIU, Z.; SUNZHU, Y.; ZHOU, X.; HONG, J.; WU, J. Monoclonal antibody-based serological detection of Citrus yellow vein clearing virus in citrus groves. *Journal of Integrative Agriculture* **2017**, *16*, 884–891, doi:10.1016/S2095-3119(16)61475-2.
175. Salem, R.; Arif, I.A.; Salama, M.; Osman, G.E. Polyclonal antibodies against the recombinantly expressed coat protein of the Citrus psorosis virus. *Saudi Journal of Biological Sciences* **2018**, *25*, 733–738, doi:10.1016/j.sjbs.2017.10.018.
176. Ali, G.; Abma-Henkens, M.H.; van der Werf, W.; Hemerik, L.; Vlak, J.M. Genotype assembly, biological activity and adaptation of spatially separated isolates of Spodoptera litura nucleopolyhedrovirus. *Journal of Invertebrate Pathology* **2018**, *153*, 20–29, doi:10.1016/j.jip.2018.01.009.
177. Beperet, I.; Simón, O.; Williams, T.; López-Ferber, M.; Caballero, P. The “11K” gene family members sf68, sf95 and sf138 modulate transmissibility and insecticidal properties of Spodoptera frugiperda multiple nucleopolyhedrovirus. *Journal of Invertebrate Pathology* **2015**, *127*, 101–109, doi:10.1016/j.jip.2015.03.008.
178. Bernal, A.; Williams, T.; Hernández-Suárez, E.; Carnero, A.; Caballero, P.; Simón, O. A native variant of Chrysodeixis chalcites nucleopolyhedrovirus: The basis for a promising bioinsecticide for control of C. chalcites on Canary Islands’ banana crops. *Biological Control* **2013**, *67*, 101–110, doi:10.1016/j.biocontrol.2013.08.006.
179. Bixby, A.J.; Potter, D.A. Influence of endophyte (Neotyphodium lolii) infection of perennial ryegrass on susceptibility of the black cutworm (Lepidoptera: Noctuidae) to a baculovirus. *Biological Control* **2010**, *54*, 141–146, doi:10.1016/j.biocontrol.2010.04.003.
180. Bouneb, M.; Turchetti, T.; Nannelli, R.; Roversi, P.F.; Paoli, F.; Danti, R.; Simoni, S. Occurrence and transmission of mycovirus Cryphonectria hypovirus 1 from dejecta of Thyreophagus corticalis (Acari, Acaridae). *Fungal Biology* **2016**, *120*, 351–357, doi:10.1016/j.funbio.2015.11.004.
181. Cabodevilla, O.; Ibañez, I.; Simón, O.; Murillo, R.; Caballero, P.; Williams, T. Occlusion body pathogenicity, virulence and productivity traits vary with transmission strategy in a nucleopolyhedrovirus. *Biological Control* **2011**, *56*, 184–192, doi:10.1016/j.biocontrol.2010.10.007.
182. Carpio, C.; Dangles, O.; Dupas, S.; Léry, X.; López-Ferber, M.; Orbe, K.; Páez, D.; Rebaudo, F.; Santillán, A.; Yangari, B.; et al. Development of a viral biopesticide for the control of the Guatemala potato tuber moth Tecia solanivora. *Journal of Invertebrate Pathology* **2013**, *112*, 184–191, doi:10.1016/j.jip.2012.11.014.
183. Castro, M.E.B.; Melo, F.L.; Tagliari, M.; Inglis, P.W.; Craveiro, S.R.; Ribeiro, Z.M.A.; Ribeiro, B.M.; Báó, S.N. The genome sequence of Condylorrhiza vestigialis NPV, a novel baculovirus for the control of the Alamo moth on Populus spp. in Brazil. *Journal of Invertebrate Pathology* **2017**, *148*, 152–161, doi:10.1016/j.jip.2017.06.013.
184. Chen, Y.-Y.; Lin, J.-W.; Fan, Y.-C.; Tu, W.-C.; Chang, G.-J.J.; Chiou, S.-S. First detection of the Africa/Caribbean/Latin American subtype of Culex flavivirus in Asian country, Taiwan. *Comparative Immunology, Microbiology and Infectious Diseases* **2013**, *36*, 387–396, doi:10.1016/j.cimid.2013.02.001.
185. CHEN, Z.; YANG, Y.; ZHANG, J.; JIN, M.; XIAO, Y.; XIA, Z.; LIU, Y.; YU, S.; YANG, Y.; WANG, Y.; et al. Susceptibility and tissue specificity of Spodoptera frugiperda to

- Junonia coenia densovirus. *Journal of Integrative Agriculture* **2021**, 20, 840–849, doi:10.1016/S2095-3119(20)63163-X.
186. Del-Angel, C.; Lasa, R.; Mercado, G.; Rodríguez-del-Bosque, L.A.; Caballero, P.; Williams, T. Acquisition of lethal infection, hypermobility and modified climbing behavior in nucleopolyhedrovirus infected larvae of *Anticarsia gemmatilis*. *Biological Control* **2018**, 125, 90–97, doi:10.1016/j.biocontrol.2018.07.006.
187. Fister, S.; Fuchs, S.; Stessl, B.; Schoder, D.; Wagner, M.; Rossmannith, P. Screening and characterisation of bacteriophage P100 insensitive *Listeria monocytogenes* isolates in Austrian dairy plants. *Food Control* **2016**, 59, 108–117, doi:10.1016/j.foodcont.2015.05.026.
188. García-Banderas, D.; Tamayo-Mejía, F.; Pineda, S.; La Rosa, J.I.F. de; Lasa, R.; Chavarrieta-Yáñez, J.M.; Gervasio-Rosas, E.; Zamora-Avilés, N.; Morales, S.I.; Ramos-Ortiz, S.; et al. Biological characterization of two *Spodoptera frugiperda* nucleopolyhedrovirus isolates from Mexico and evaluation of one isolate in a small-scale field trial. *Biological Control* **2020**, 149, 104316, doi:10.1016/j.biocontrol.2020.104316.
189. Gasque, S.N.; van Oers, M.M.; Ros, V.I.D. Where the baculoviruses lead, the caterpillars follow: baculovirus-induced alterations in caterpillar behaviour. *Current Opinion in Insect Science* **2019**, 33, 30–36, doi:10.1016/j.cois.2019.02.008.
190. Gupta, R.K.; Gani, M.; Kaul, V.; Bhagat, R.M.; Bali, K.; Samnotra, R.K. Field evaluation of *Lymantria obfuscata* multiple nucleopolyhedrovirus for the management of Indian gypsy moth in Jammu & Kashmir, India. *Crop Protection* **2016**, 80, 149–158, doi:10.1016/j.cropro.2015.11.008.
191. Infante-Rodríguez, D.A.; Berber, J.J.; Mercado, G.; Valenzuela-González, J.; Muñoz, D.; Williams, T. Earthworm mediated dispersal of baculovirus occlusion bodies: Experimental evidence from a model system. *Biological Control* **2016**, 100, 18–24, doi:10.1016/j.biocontrol.2016.05.005.
192. Jayachandran, B.; Hussain, M.; Asgari, S. Regulation of *Helicoverpa armigera* ecdysone receptor by miR-14 and its potential link to baculovirus infection. *Journal of Invertebrate Pathology* **2013**, 114, 151–157, doi:10.1016/j.jip.2013.07.004.
193. Kariithi, H.M.; Meki, I.K.; Boucias, D.G.; Abd-Alla, A.M.M. Hytrosaviruses: current status and perspective. *Current Opinion in Insect Science* **2017**, 22, 71–78, doi:10.1016/j.cois.2017.05.009.
194. Kariithi, H.M.; van Lent, J.; van Oers, M.M.; Abd-Alla, A.M.; Vlak, J.M. Proteomic footprints of a member of Glossinavirus (Hytrosaviridae): An expeditious approach to virus control strategies in tsetse factories. *Journal of Invertebrate Pathology* **2013**, 112, S26–S31, doi:10.1016/j.jip.2012.07.016.
195. Kemp, E.M.; Woodward, D.T.; Cory, J.S. Detection of single and mixed covert baculovirus infections in eastern spruce budworm, *Choristoneura fumiferana* populations. *Journal of Invertebrate Pathology* **2011**, 107, 202–205, doi:10.1016/j.jip.2011.05.015.
196. Lasa, R.; Guerrero-Analco, J.A.; Monribot-Villanueva, J.L.; Mercado, G.; Williams, T. Why do *Spodoptera exigua* multiple nucleopolyhedrovirus occlusion bodies lose insecticidal activity on amaranth (*Amaranthus hypocondriacus* L.)? *Biological Control* **2018**, 126, 74–82, doi:10.1016/j.biocontrol.2018.07.014.
197. Lietze, V.-U.; Keesling, J.E.; Lee, J.A.; Vallejo, C.R.; Geden, C.J.; Boucias, D.G. Muscavirus (MdSGHV) disease dynamics in house fly populations – How is this virus transmitted and has it potential as a biological control agent? *Journal of Invertebrate Pathology* **2013**, 112, S40–S43, doi:10.1016/j.jip.2012.07.017.
198. Llopis-Giménez, A.; Maria González, R.; Millán-Leiva, A.; Catalá, M.; Llacer, E.; Urbaneja, A.; Herrero, S. Novel RNA viruses producing simultaneous covert infections in

- Ceratitis capitata. Correlations between viral titers and host fitness, and implications for SIT programs. *Journal of Invertebrate Pathology* **2017**, 143, 50–60, doi:10.1016/j.jip.2016.11.014.
199. Nalcacioglu, R.; Muratoglu, H.; Yesilyurt, A.; van Oers, M.M.; Vlak, J.M.; Demirbag, Z. Enhanced insecticidal activity of Chilo iridescent virus expressing an insect specific neurotoxin. *Journal of Invertebrate Pathology* **2016**, 138, 104–111, doi:10.1016/j.jip.2016.06.010.
200. Ottati, S.; Persico, A.; Rossi, M.; Bosco, D.; Vallino, M.; Abbà, S.; Molinatto, G.; Palmano, S.; Balestrini, R.; Galetto, L.; et al. Biological characterization of Euscelidius variegatus iflavivirus 1. *Journal of Invertebrate Pathology* **2020**, 173, 107370, doi:10.1016/j.jip.2020.107370.
201. Parreño, R.; Torres, S.; Almagro, L.; Belló-Pérez, M.; Estepa, A.; Perez, L. Induction of viral interference by IPNV-carrier cells on target cells: A cell co-culture study. *Fish & Shellfish Immunology* **2016**, 58, 483–489, doi:10.1016/j.fsi.2016.09.052.
202. Rabalski, L.; Krejmer-Rabalska, M.; Skrzecz, I.; Wasag, B.; Szewczyk, B. An alphabaculovirus isolated from dead Lymantria dispar larvae shows high genetic similarity to baculovirus previously isolated from Lymantria monacha – An example of adaptation to a new host. *Journal of Invertebrate Pathology* **2016**, 139, 56–66, doi:10.1016/j.jip.2016.07.011.
203. Saunders, G.; Cooke, B.; McColl, K.; Shine, R.; Peacock, T. Modern approaches for the biological control of vertebrate pests: An Australian perspective. *Biological Control* **2010**, 52, 288–295, doi:10.1016/j.biocontrol.2009.06.014.
204. Serrano, A.; Pijlman, G.P.; Vlak, J.M.; Muñoz, D.; Williams, T.; Caballero, P. Identification of Spodoptera exigua nucleopolyhedrovirus genes involved in pathogenicity and virulence. *Journal of Invertebrate Pathology* **2015**, 126, 43–50, doi:10.1016/j.jip.2015.01.008.
205. Shikano, I.; McCarthy, E.M.; Elder, B.D.; Hoover, K. Plant genotype and induced defenses affect the productivity of an insect-killing obligate viral pathogen. *Journal of Invertebrate Pathology* **2017**, 148, 34–42, doi:10.1016/j.jip.2017.05.001.
206. Simón, O.; Palma, L.; Williams, T.; López-Ferber, M.; Caballero, P. Analysis of a naturally-occurring deletion mutant of Spodoptera frugiperda multiple nucleopolyhedrovirus reveals sf58 as a new per os infectivity factor of lepidopteran-infecting baculoviruses. *Journal of Invertebrate Pathology* **2012**, 109, 117–126, doi:10.1016/j.jip.2011.10.010.
207. Souza, M.L.; Sanches, M.M.; Souza, D.A. de; Faria, M.; Espinel-Correal, C.; Sihler, W.; Lopes, R.B. Within-host interactions of Metarhizium rileyi strains and nucleopolyhedroviruses in Spodoptera frugiperda and Anticarsia gemmatilis (Lepidoptera: Noctuidae). *Journal of Invertebrate Pathology* **2019**, 162, 10–18, doi:10.1016/j.jip.2019.01.006.
208. Takatsuka, J. Lymantria mathura nucleopolyhedrovirus: Identification, occurrence and genetic diversity in Iwate Prefecture, Japan. *Journal of Invertebrate Pathology* **2016**, 138, 1–9, doi:10.1016/j.jip.2016.05.006.
209. Takatsuka, J.; Okuno, S.; Ishii, T.; Nakai, M.; Kunimi, Y. Fitness-related traits of entomopoxviruses isolated from Adoxophyes honmai (Lepidoptera: Tortricidae) at three localities in Japan. *Journal of Invertebrate Pathology* **2010**, 105, 121–131, doi:10.1016/j.jip.2010.04.010.

210. Tian, Z.; Zha, M.; Cai, L.; Michaud, J.P.; Cheng, J.; Shen, Z.; Liu, X.; Liu, X. FoxO-promoted peroxiredoxin1 expression induced by *Helicoverpa armigera* single nucleopolyhedrovirus infection mediates host development and defensive responses. *Ecotoxicology and Environmental Safety* **2022**, *234*, 113414, doi:10.1016/j.ecoenv.2022.113414.
211. Yang, Q.; Ding, Y.; Nie, R.; Yao, L.; Wang, X.; Zhou, M.; Wang, J.; Wang, X. Characterization of a novel T7-like *Salmonella* Typhimurium (ATCC13311) bacteriophage LPST144 and its endolysin. *LWT* **2020**, *123*, 109034, doi:10.1016/j.lwt.2020.109034.
212. Zwart, M.P.; van der Werf, W.; Georgievska, L.; van Oers, M.M.; Vlak, J.M.; Cory, J.S. Mixed-genotype infections of *Trichoplusia ni* larvae with *Autographa californica* multicapsid nucleopolyhedrovirus: Speed of action and persistence of a recombinant in serial passage. *Biological Control* **2010**, *52*, 77–83, doi:10.1016/j.biocontrol.2009.10.002.
